# Supplementary material
Source: PubMed Central journal article supplement (PMC9877778)
Supplement: JMV-95-0-s001.pdf [file JMV-95-0-s001.pdf]

1 **Supplements to: Impact of the COVID-19 pandemic on the circulation of**  
2 **other pathogens in England**

3 **Running title:**

4 Lauren Hayes<sup>1#</sup>, Hannah Uri<sup>1#</sup>, Denisa Bojkova<sup>2</sup>, Jindrich Cinatl jr.<sup>2,3</sup>, Mark N. Wass<sup>1\*</sup>,  
5 Martin Michaelis<sup>1\*</sup>

6 <sup>1</sup> School of Biosciences, University of Kent, Canterbury CT2 7NJ, UK

7 <sup>2</sup> Institute for Medical Virology, University Hospital, Goethe University, Paul Ehrlich-  
8 Str. 40, 60596 Frankfurt am Main, Germany

9 <sup>3</sup> Dr. Petra Joh-Forschungshaus, Komturstr. 3A, 60528 Frankfurt am Main, Germany

10  
11 # equal contribution

12  
13 \* Corresponding authors:

14 Mark Wass, School of Biosciences, University of Kent, Canterbury CT2 7NJ, UK;  
15 phone +44 1227 82 7626; e-mail M.N.Wass@kent.ac.uk

16 Martin Michaelis, School of Biosciences, University of Kent, Canterbury CT2 7NJ, UK;  
17 phone +44 1227 82 7804; e-mail M.Michaelis@kent.ac.uk

## 18 **Suppl. Methods**

### 19 **Infectious disease data sources**

20 The infectious diseases that were studied in this report are presented together with  
21 their anticipated modes of transmission in Suppl. Table 1. 'Influenza-like illness'  
22 include diseases that were diagnosed as influenza based on the sudden onset of  
23 clinical symptoms including runny nose, fever, malaise, aches, cough, sneezing, and  
24 nausea, which was not always confirmed by a diagnostic test. Hence, some cases  
25 may have been caused by other respiratory viruses [Fitzner et al., 2018]. 'Skin and  
26 subcutaneous tissue infections' encompasses both uncomplicated and necrotising  
27 pathological conditions of the skin or subcutaneous fat, resulting in erythema,  
28 oedema, inflammation, and pain. This includes (but is not limited to) diseases such  
29 as cellulitis, impetigo, folliculitis, abscesses, carbuncles, and trauma-related  
30 infections [Esposito et al., 2017]. 'Infectious intestinal diseases' refers to infections of  
31 the stomach, small intestine, and/or bowel, with symptoms including diarrhoea,  
32 vomiting, and abdominal pain, typically reflecting diseases such as gastroenteritis,  
33 cholera, and typhoid fever [Donaldson et al., 2019].

34 Weekly case numbers were available for England for all diseases, except for  
35 methicillin resistant *Staphylococcus aureus* (MRSA), Lyme disease, and hepatitis E  
36 that were recorded quarterly. For diseases with seasonal transmission patterns  
37 (influenza-like illnesses, pneumococcal disease, strep throat, scarlet fever  
38 cryptosporidiosis, foodborne illness, norovirus, Lyme disease), the average season  
39 peaks were calculated based on the included pre-COVID-19 years.

40 Infectious disease case number dynamics during the COVID-19 pandemic were  
41 compared to those of COVID-19 and in the context of the prevention measures that  
42 were in place at the time. Rubella was excluded from the analysis due to low case  
43 numbers (<5) and diseases with cumulative quarterly cases due to lack of  
44 comparable data.

45 Links to each data source are provided in the respective figure legends. Measles,  
46 mumps and rubella (MMR), tuberculosis, scarlet fever, foodborne illness and  
47 whooping cough case numbers reported to the UK Health Security Agency (UKHSA)  
48 by medical practitioners were derived from the PHE Notifications of Infectious  
49 Diseases (NOIDs) database

50 [[https://www.gov.uk/government/collections/notifications-of-infectious-diseases-](https://www.gov.uk/government/collections/notifications-of-infectious-diseases-noids)  
51 [noids](https://www.gov.uk/government/collections/notifications-of-infectious-diseases-noids)]. Lyme disease, hepatitis C, hepatitis E, cryptosporidiosis, shigellosis, strep  
52 throat, and pneumococcal disease case numbers were derived from NOIDs  
53 causative agent reports, which are based on notifications from laboratories in  
54 England [[https://www.gov.uk/government/collections/notifications-of-infectious-](https://www.gov.uk/government/collections/notifications-of-infectious-diseases-noids)  
55 [diseases-noids](https://www.gov.uk/government/collections/notifications-of-infectious-diseases-noids)].

56 MRSA data was derived from the joint UKHSA/ Office for National Statistics (ONS)  
57 MRSA bacteraemia monthly count reports

58 [[https://www.gov.uk/government/statistics/mrsa-bacteraemia-monthly-data-by-](https://www.gov.uk/government/statistics/mrsa-bacteraemia-monthly-data-by-location-of-onset)  
59 [location-of-onset](https://www.gov.uk/government/statistics/mrsa-bacteraemia-monthly-data-by-location-of-onset)].

60 Laboratory confirmed norovirus cases were extracted from 2020 to 2022 national  
61 norovirus and rotavirus bulletins (from 2020 onwards)

62 [[https://www.gov.uk/government/statistical-data-sets/national-norovirus-and-](https://www.gov.uk/government/statistical-data-sets/national-norovirus-and-rotavirus-bulletin-management-information--2)  
63 [rotavirus-bulletin-management-information--2](https://www.gov.uk/government/statistical-data-sets/national-norovirus-and-rotavirus-bulletin-management-information--2)] and weekly UKHSA reports (prior to  
64 2020) [[https://www.gov.uk/government/statistics/norovirus-and-rotavirus-summary-](https://www.gov.uk/government/statistics/norovirus-and-rotavirus-summary-of-surveillance-2019-to-2020)  
65 [of-surveillance-2019-to-2020](https://www.gov.uk/government/statistics/norovirus-and-rotavirus-summary-of-surveillance-2019-to-2020)]. Data was extracted from the norovirus routine  
66 laboratory reports of positive norovirus samples from the Second Generation  
67 Surveillance System (SGSS).

68 Chickenpox, influenza-like-illness (ILI), herpes simplex virus (HSV), infectious  
69 intestinal disease, skin and subcutaneous tissue infection (SSTI), and urinary tract  
70 infection (UTI) data was derived from the Royal Collage of General Practitioners  
71 (RCGP) Research and Surveillance Centre (RSC) public health data  
72 [<https://www.rcgp.org.uk/representing-you/research-at-rcgp/research-surveillance-centre/public-health-data>]. COVID-19 data was derived from the Coronavirus  
73 (COVID-19) Infection Survey of the ONS  
74 [<https://www.ons.gov.uk/peoplepopulationandcommunity/healthandsocialcare/conditionsanddiseases/datasets/coronaviruscovid19infectionsurveydata>].  
75 Information on circulating SARS-CoV-2 variants was derived from the variants of  
76 concern technical briefing 44 (22 July 2022) of UKHSA  
77 [<https://www.gov.uk/government/publications/investigation-of-sars-cov-2-variants-technical-briefings>].  
78  
79  
80  
81

## 82 **Timeline of protection measures**

83 An overview of the timing of prevention measures is provided in Suppl. Table 2.  
84 Dates and guidance are based on the British Foreign Policy Group (BFPG) COVID-  
85 19 Timeline by Evie Aspinall (<https://bfpg.co.uk/2020/04/covid-19-timeline/>). The  
86 accuracy of this information was confirmed using GOV.UK guidance, policy papers,  
87 and records including prime minister statements and daily press briefings on  
88 governmental responses to the COVID-19 pandemic (Prime Minister’s statement on  
89 coronavirus (COVID-19): 23 March 2020 [Internet]. GOV.UK. [cited 2022 Aug 16].  
90 Available from: <https://www.gov.uk/government/speeches/pm-address-to-the-nation-on-coronavirus-23-march-2020>;  
91 <https://www.gov.uk/government/speeches/pm-statement-on-coronavirus-18-march-2020>;  
92 <https://www.gov.uk/government/news/prime-minister-announces-new-national-restrictions>;  
93 <https://lordslibrary.parliament.uk/covid-19-local-alert-levels-three-tier-system-for-england>;  
94 <https://www.gov.uk/government/publications/covid-19-response-autumn-and-winter-plan-2021>;  
95 <https://www.gov.uk/government/publications/covid-19-response-spring-2021>;  
96 <https://www.gov.uk/government/news/prime-minister-confirms-move-to-step-4>).  
97  
98  
99  
100

101 **References**

102 Donaldson AL, Clough HE, O'Brien SJ, Harris JP. Symptom profiling for infectious  
103 intestinal disease (IID): a secondary data analysis of the IID2 study. *Epidemiol Infect.*  
104 2019 Jan;147:e229. doi: 10.1017/S0950268819001201.

105 Esposito S, Bassetti M, Concia E, De Simone G, De Rosa FG, Grossi P, Novelli A,  
106 Menichetti F, Petrosillo N, Tinelli M, Tumbarello M, Sanguinetti M, Viale P, Venditti M,  
107 Viscoli C; Italian Society of Infectious and Tropical Diseases. Diagnosis and  
108 management of skin and soft-tissue infections (SSTI). A literature review and  
109 consensus statement: an update. *J Chemother.* 2017 Aug;29(4):197-214. doi:  
110 10.1080/1120009X.2017.1311398.

111 Fitzner J, Qasmieh S, Mounts AW, Alexander B, Besselaar T, Briand S, Brown C,  
112 Clark S, Dueger E, Gross D, Hauge S, Hirve S, Jorgensen P, Katz MA, Mafi A, Malik  
113 M, McCarron M, Meerhoff T, Mori Y, Mott J, Olivera MTDC, Ortiz JR, Palekar R,  
114 Rebelo-de-Andrade H, Soetens L, Yahaya AA, Zhang W, Vandemaele K. Revision of  
115 clinical case definitions: influenza-like illness and severe acute respiratory infection.  
116 *Bull World Health Organ.* 2018 Feb 1;96(2):122-128. doi: 10.2471/BLT.17.194514.

117

118

119 **Suppl. Figure 1**

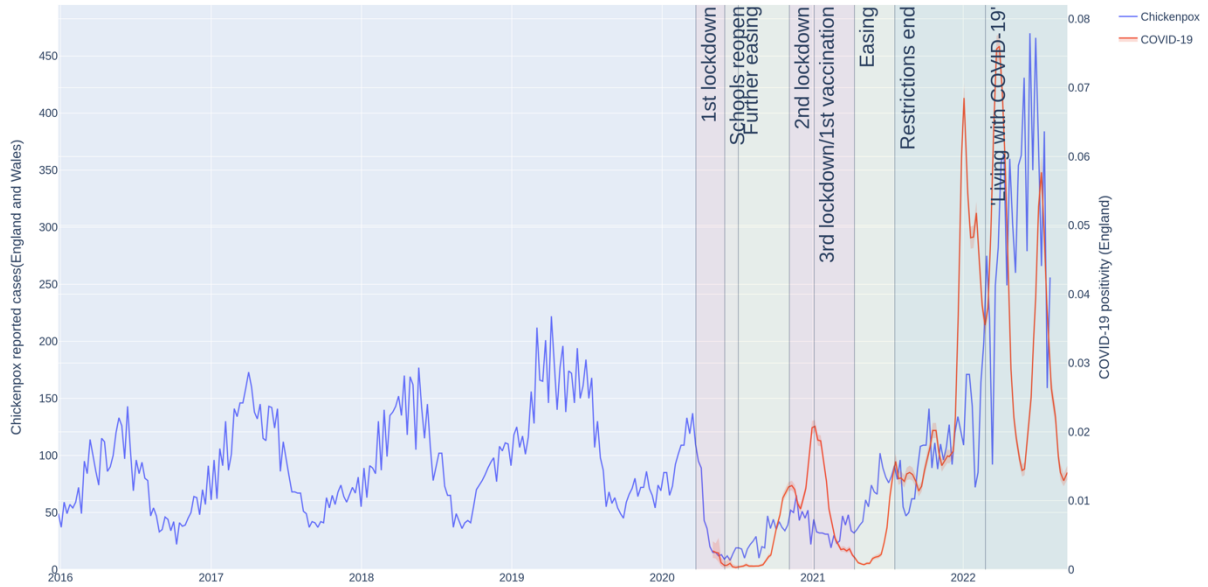

120

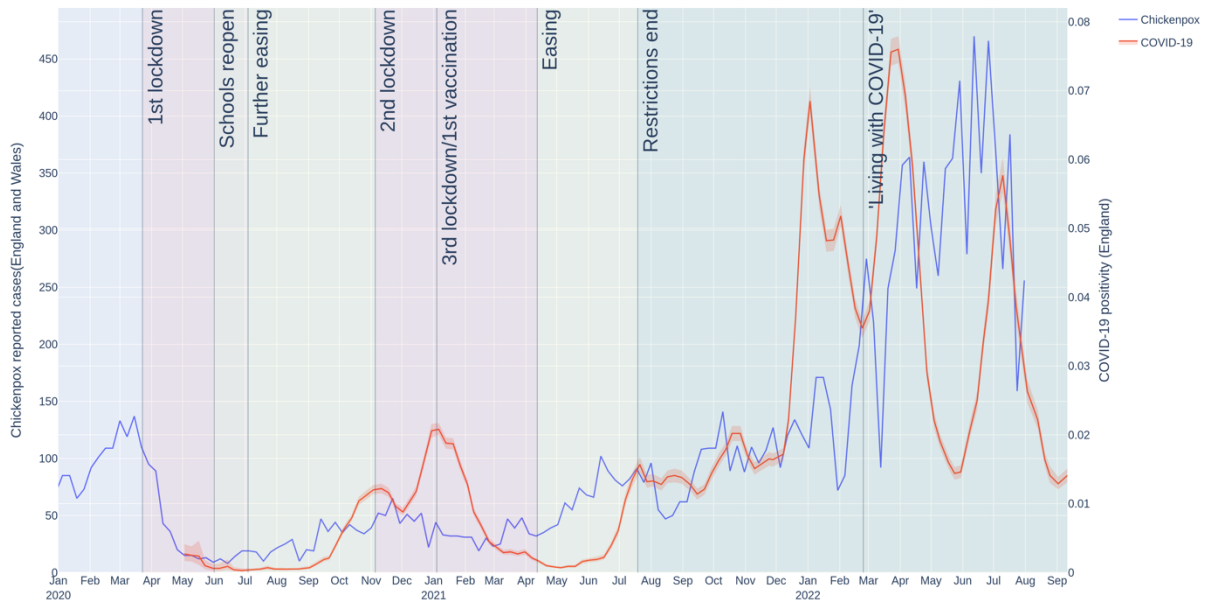

121  
122  
123  
124  
125  
126  
127

**Suppl. Figure 1. Chickenpox case numbers during the COVID-19 pandemic in England.** Weekly case numbers (chickenpox: left y-axis, blue line, COVID-19: right y-axis, orange line) starting from 1<sup>st</sup> January 2017 (top graph) or 30<sup>th</sup> December 2019 (bottom graph).

128 **Suppl. Figure 2**

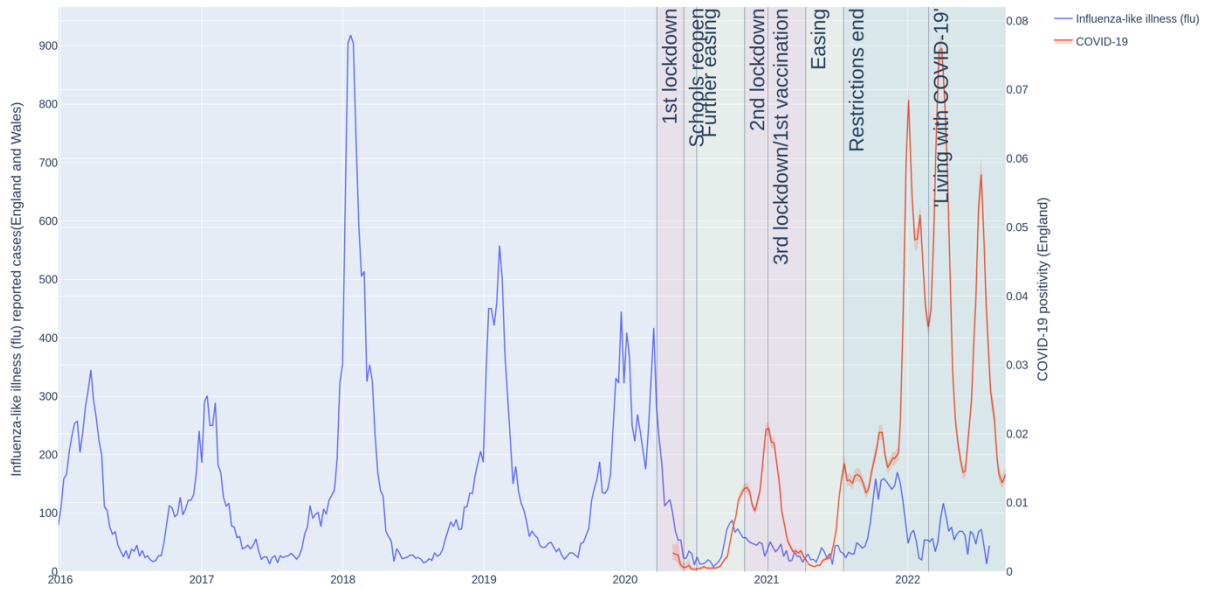

129

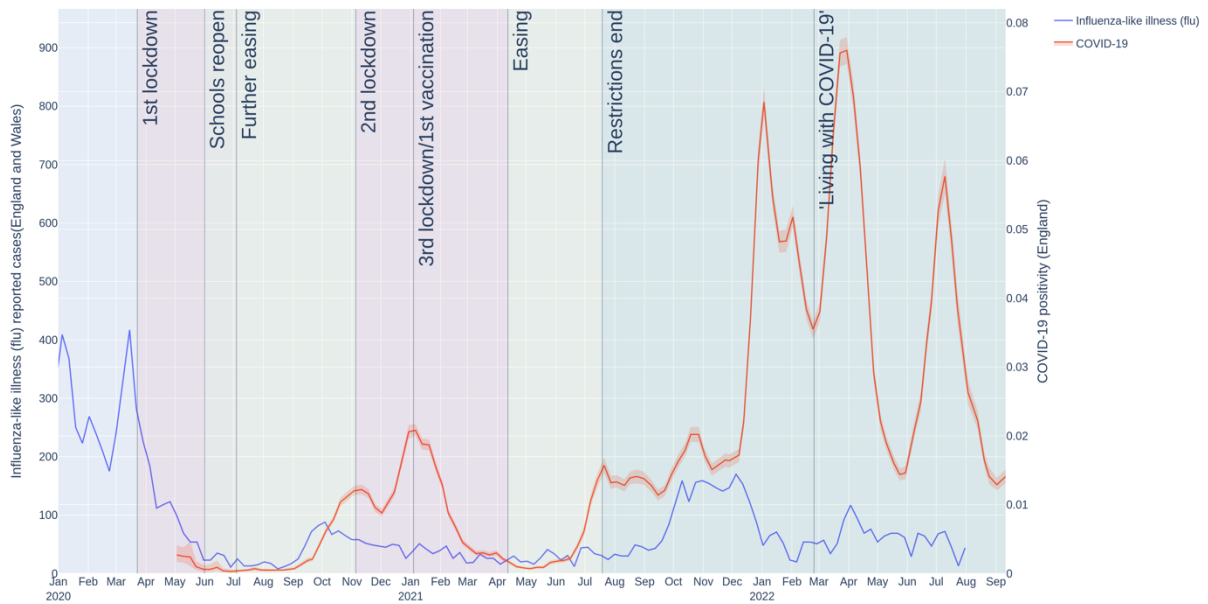

130  
131  
132  
133  
134  
135  
136

**Suppl. Figure 2. Influenza-like illness case numbers during the COVID-19 pandemic in England.** Weekly case numbers (influenza-like illnesses: left y-axis, blue line, COVID-19: right y-axis, orange line) starting from 1<sup>st</sup> January 2016 (top graph) or 30<sup>th</sup> December 2019 (bottom graph).

137 **Suppl. Figure 3**

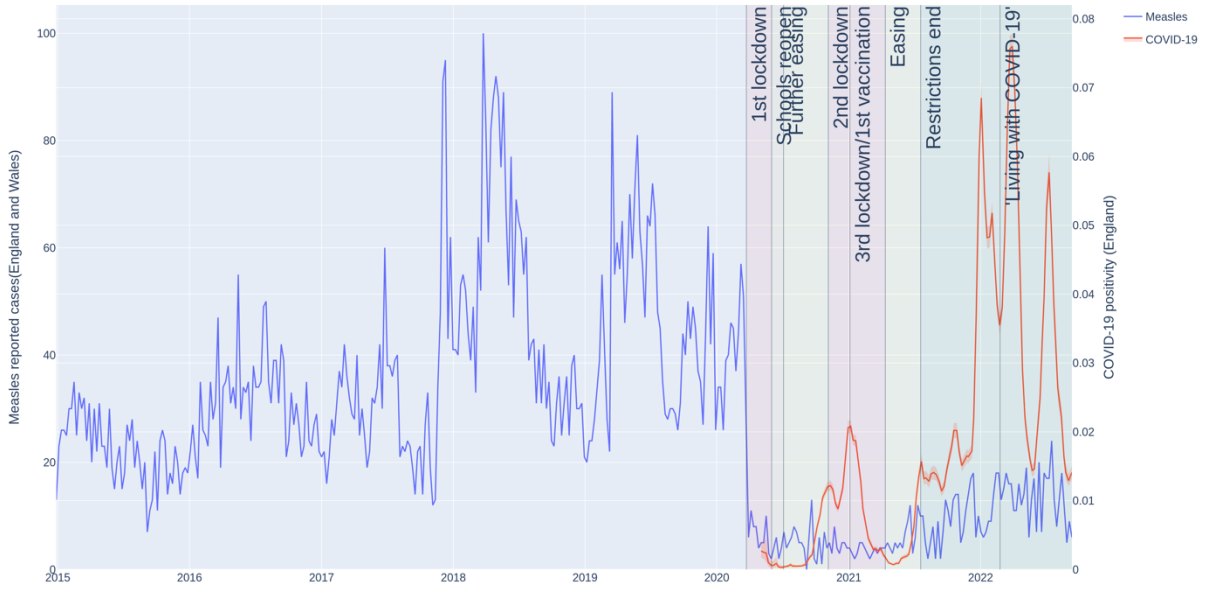

138

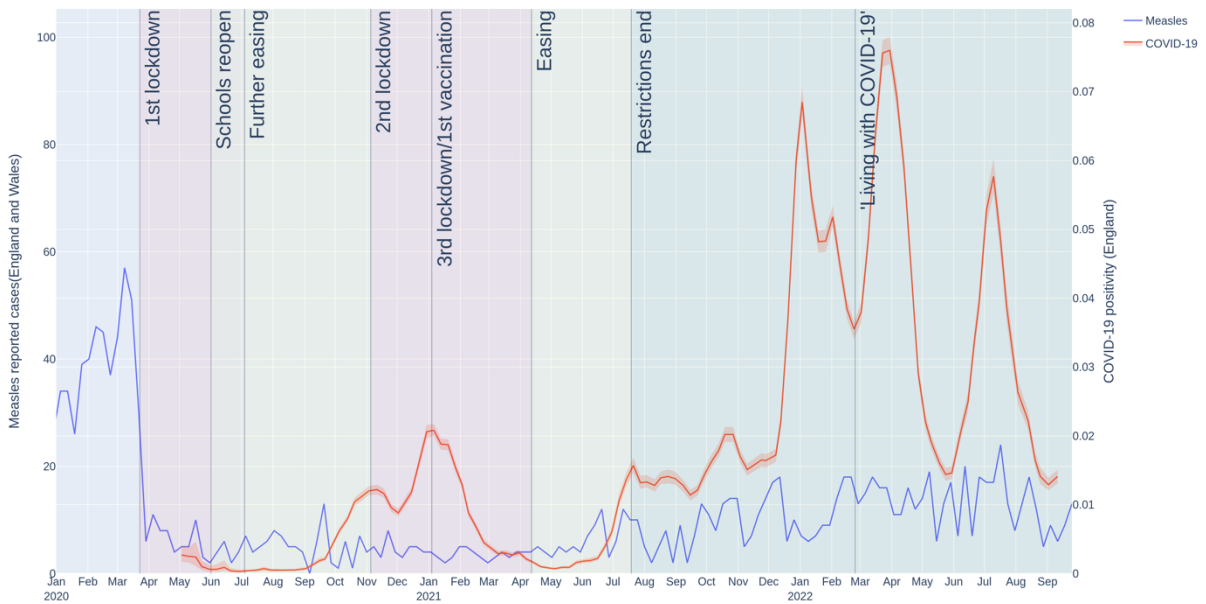

139  
140  
141  
142  
143  
144

**Suppl. Figure 3. Measles case numbers during the COVID-19 pandemic in England.** Weekly case numbers (measles: left y-axis, blue line, COVID-19: right y-axis, orange line) starting from 1<sup>st</sup> January 2015 (top graph) or 30<sup>th</sup> December 2019 (bottom graph).

145 **Suppl. Figure 4**

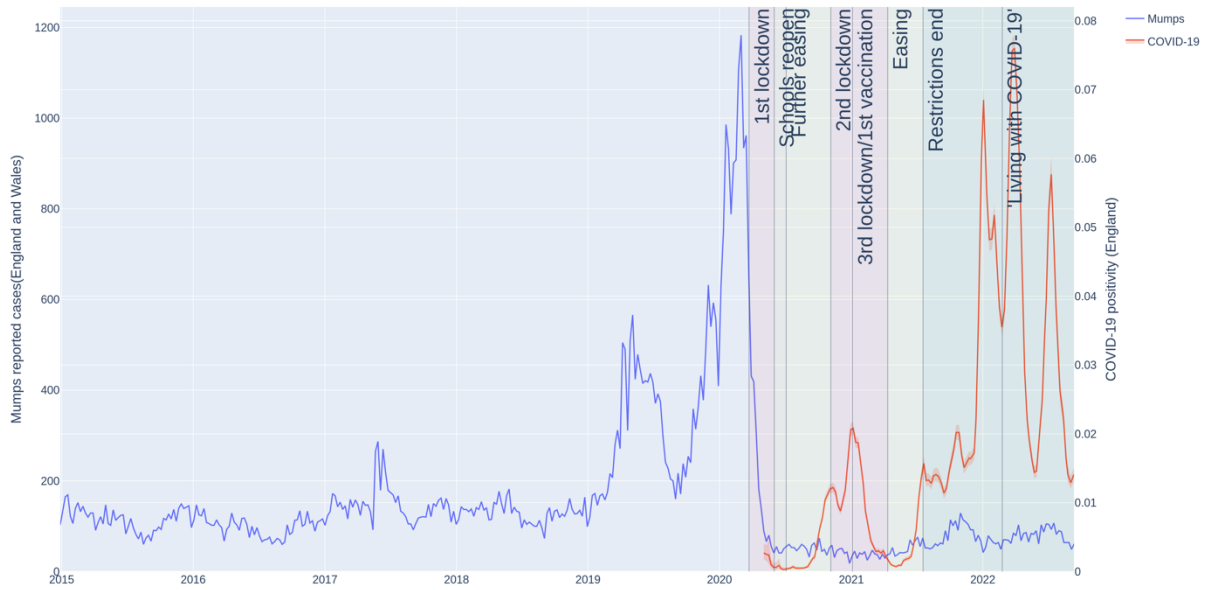

146

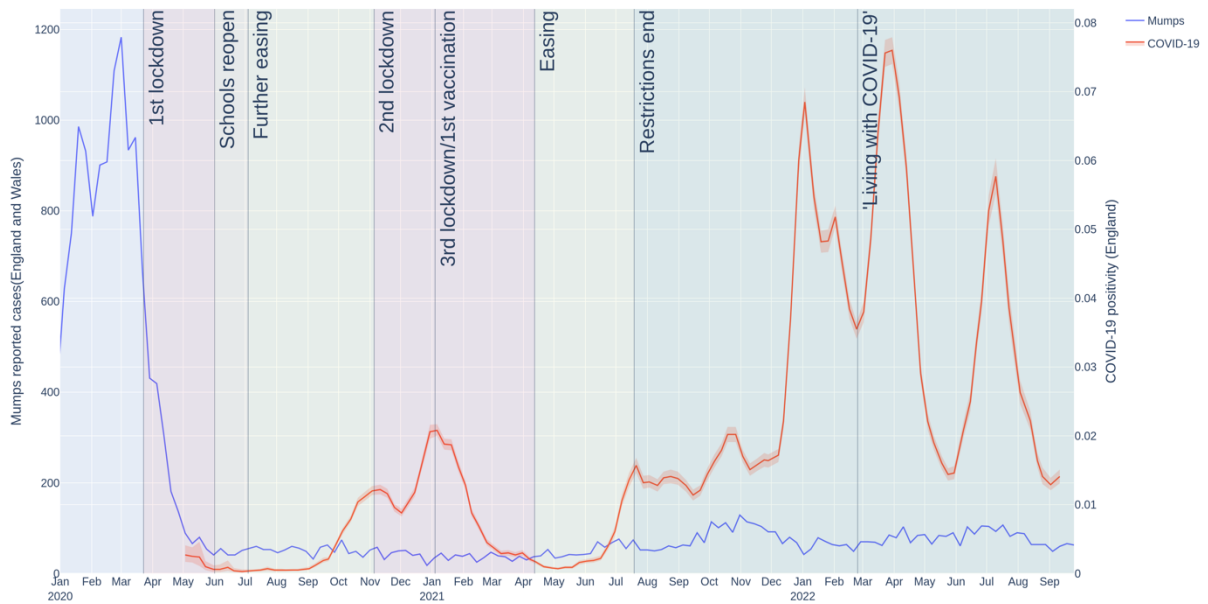

147  
148  
149  
150  
151  
152  
153

**Suppl. Figure 4. Mumps case numbers during the COVID-19 pandemic in England.** Weekly case numbers (mumps: left y-axis, blue line, COVID-19: right y-axis, orange line) starting from 1<sup>st</sup> January 2015 (top graph) or 30<sup>th</sup> December 2019 (bottom graph).



154 **Suppl. Figure 5**

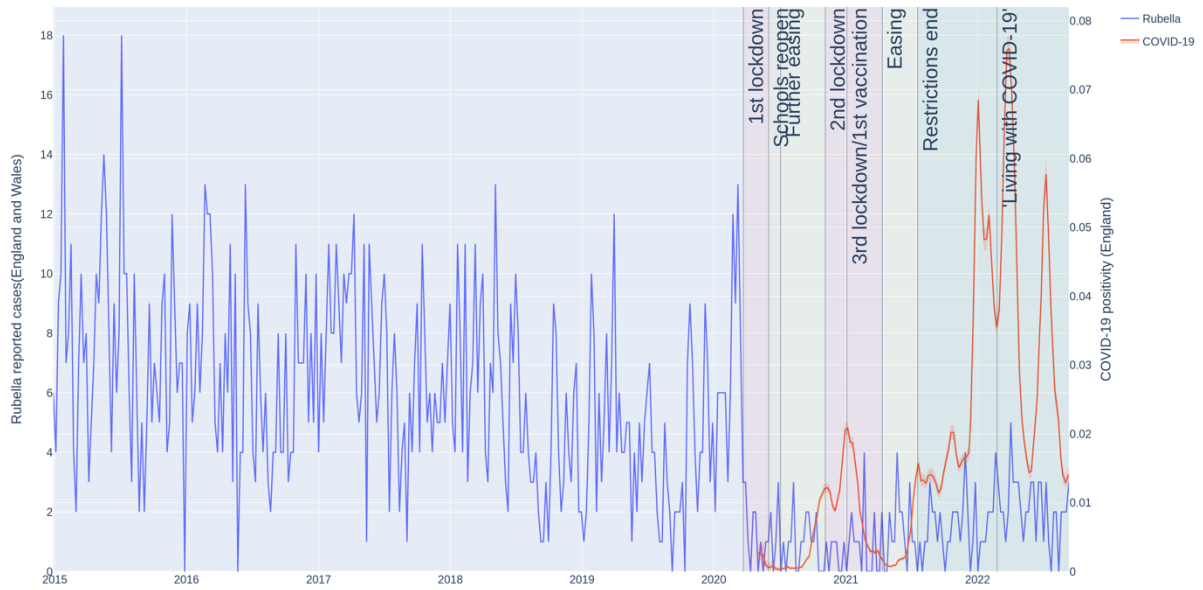

155

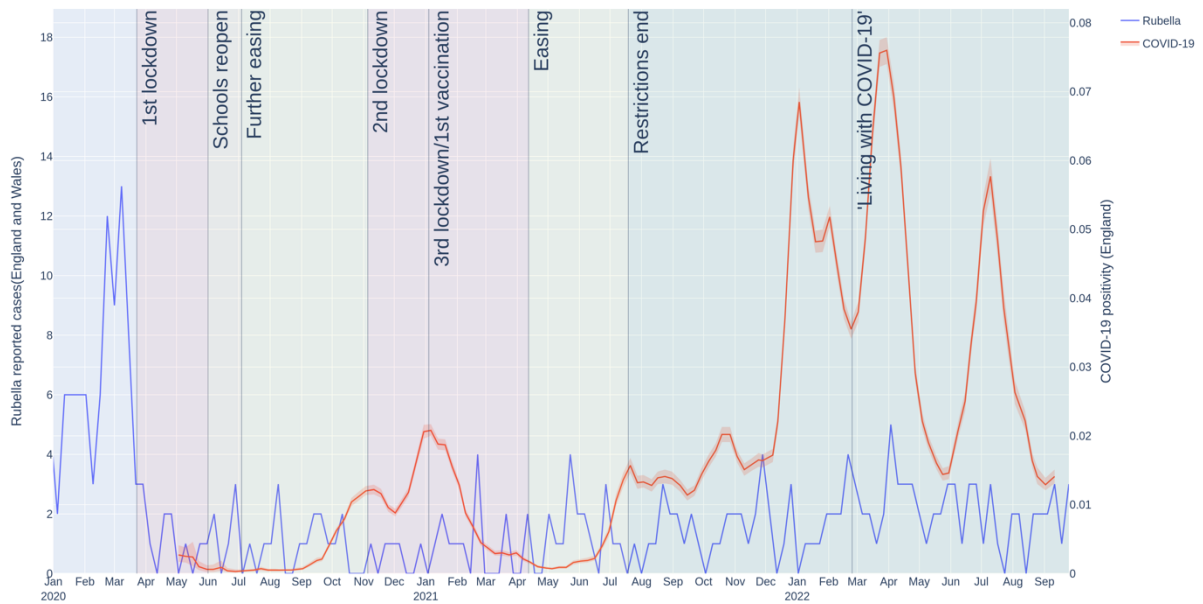

156

157

158

159

160

161

162

**Suppl. Figure 5. Rubella case numbers during the COVID-19 pandemic in England.** Weekly case numbers (rubella: left y-axis, blue line, COVID-19: right y-axis, orange line) starting from 1<sup>st</sup> January 2015 (top graph) or 30<sup>th</sup> December 2019 (bottom graph).

163 **Suppl. Figure 6**

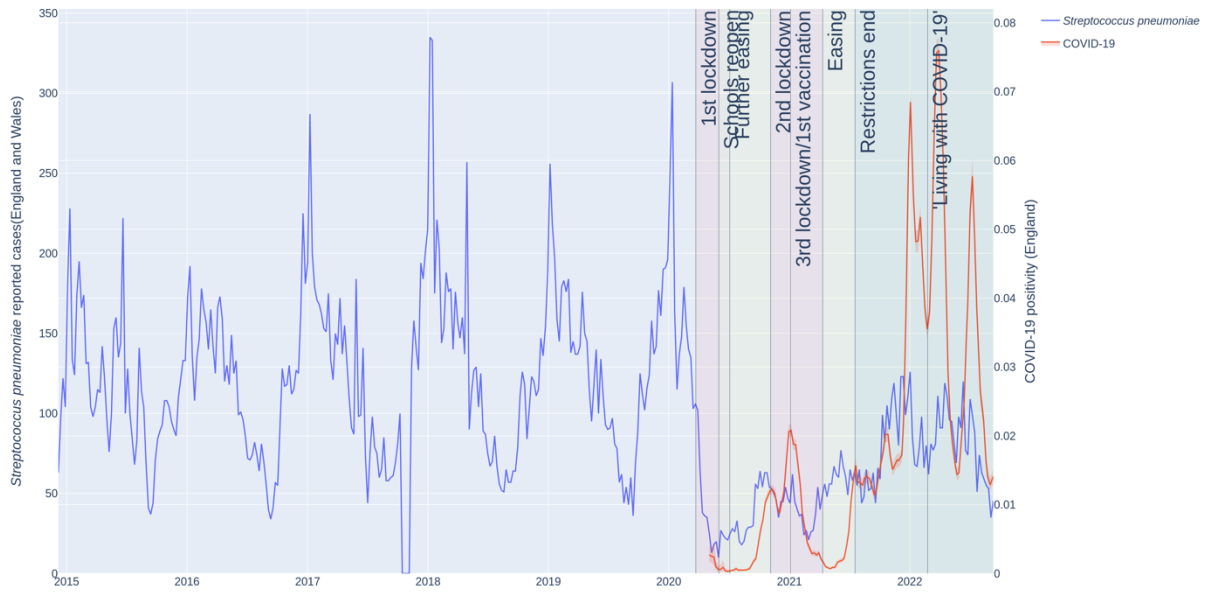

164

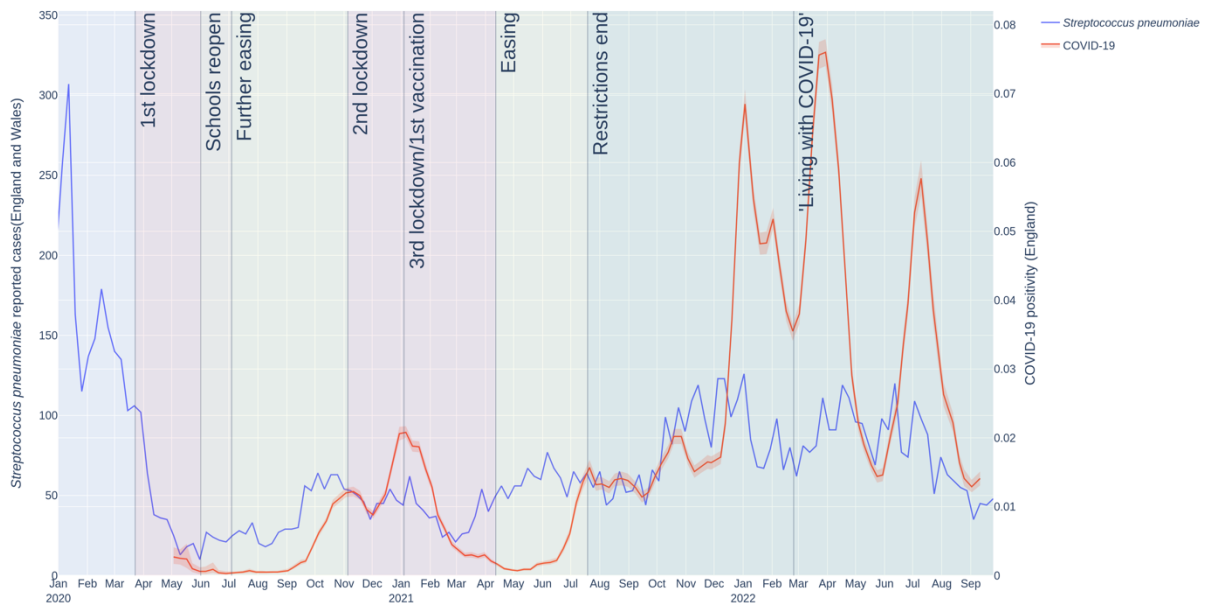

165  
166  
167  
168  
169  
170  
171

**Suppl. Figure 6. Pneumococcal disease (*Streptococcus pneumoniae*) case numbers during the COVID-19 pandemic in England. Weekly case numbers (*Streptococcus pneumoniae*: left y-axis, blue line, COVID-19: right y-axis, orange line) starting from 1<sup>st</sup> January 2015 (top graph) or 30<sup>th</sup> December 2019 (bottom graph).**

172 **Suppl. Figure 7**

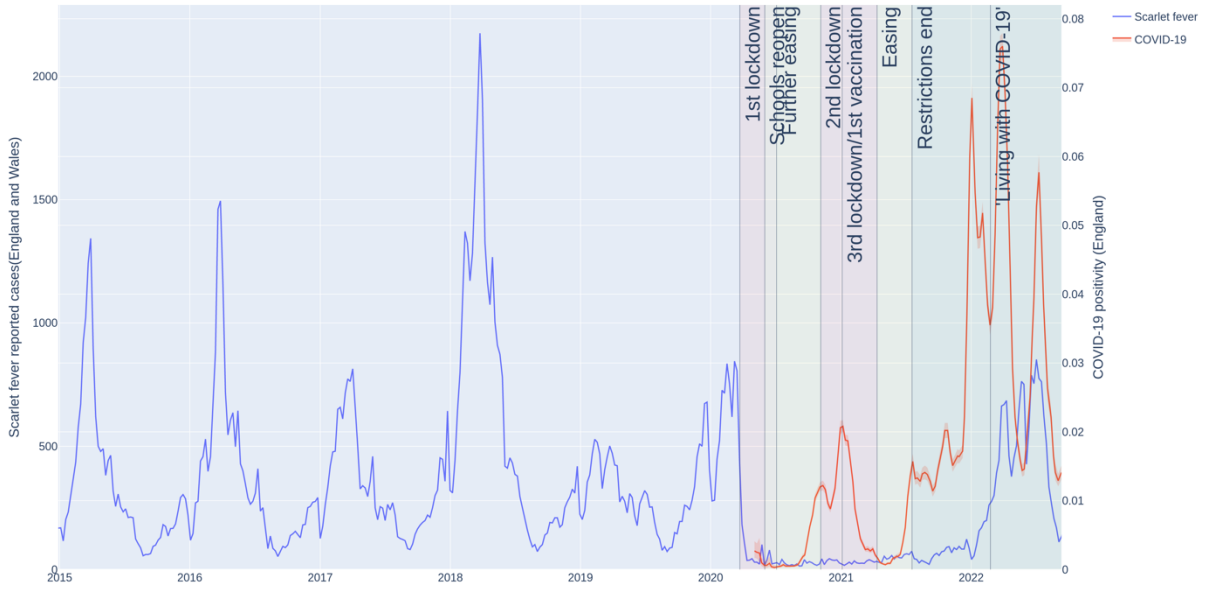

173

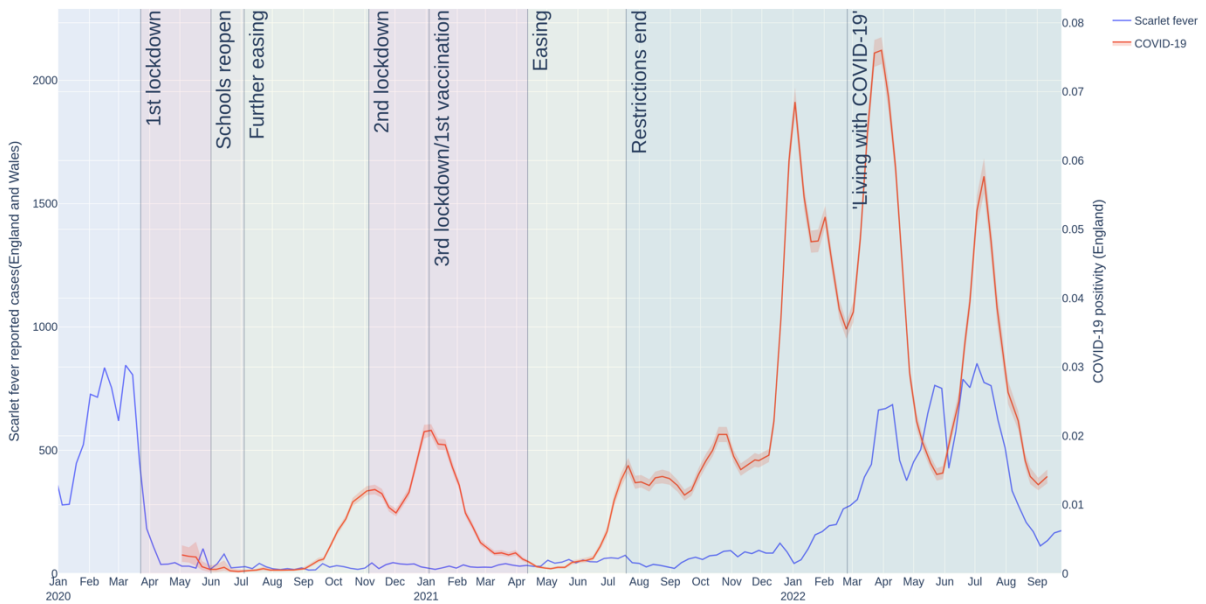

174

175

176

177

178

179

180

**Suppl. Figure 7. Scarlet fever case numbers during the COVID-19 pandemic in England.** Weekly case numbers (scarlet fever: left y-axis, blue line, COVID-19: right y-axis, orange line) starting from 1<sup>st</sup> January 2015 (top graph) or 30<sup>th</sup> December 2019 (bottom graph).

181 **Suppl. Figure 8**

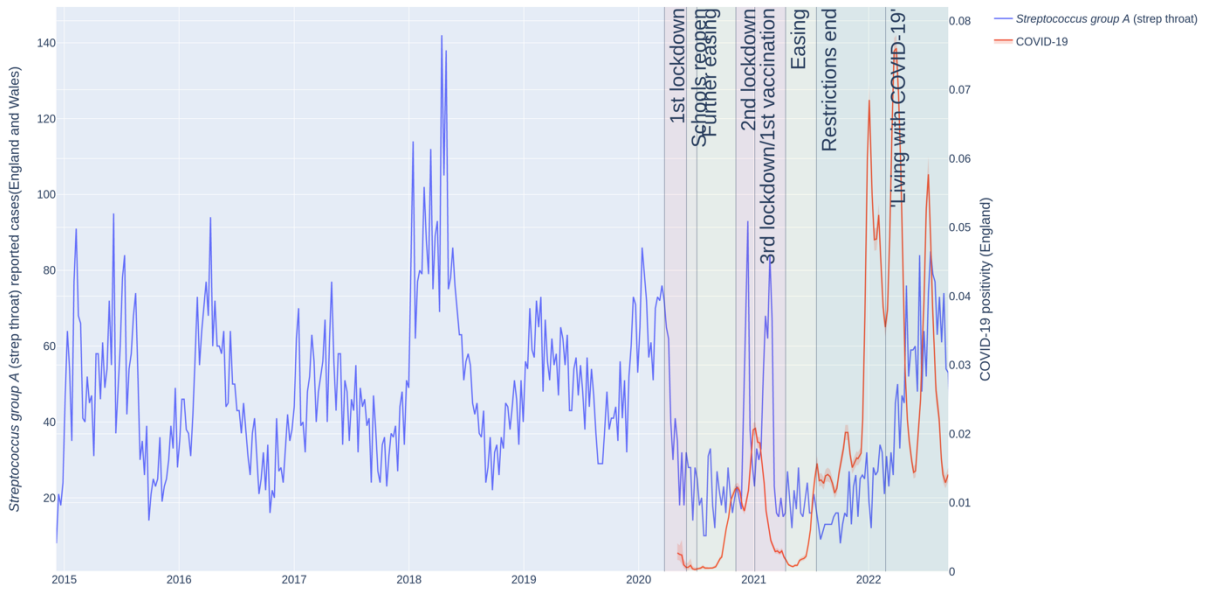

182

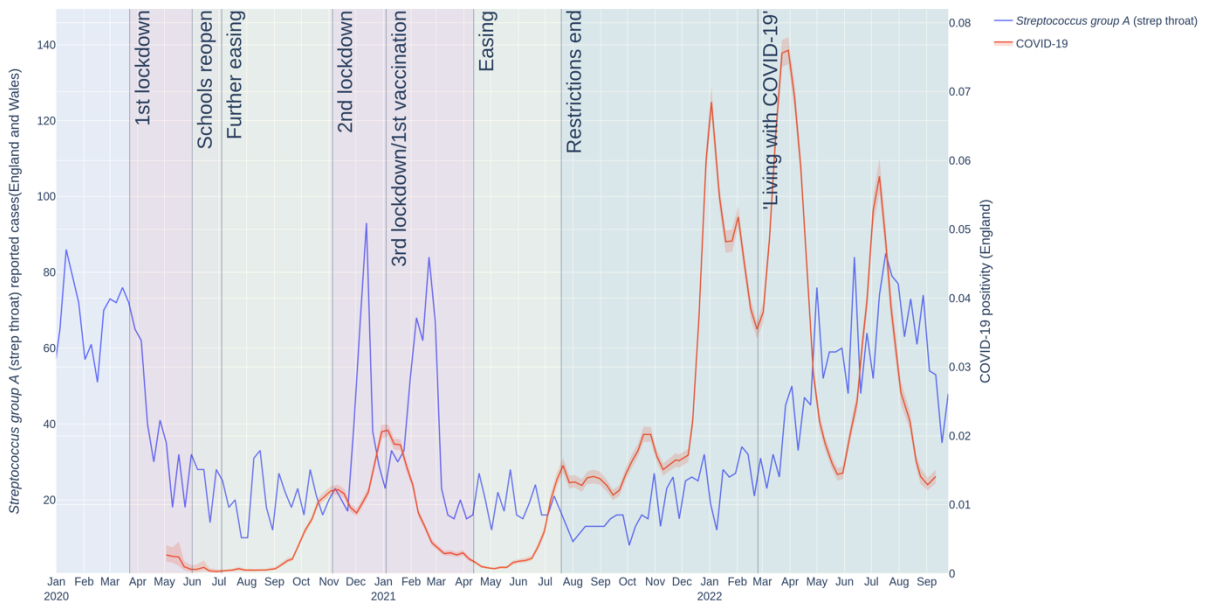

183  
184  
185  
186  
187  
188  
189

**Suppl. Figure 8. Streptococcal pharyngitis (Streptococcus group A, strep throat) case numbers during the COVID-19 pandemic in England.** Weekly case numbers (Streptococcus group A: left y-axis, blue line, COVID-19: right y-axis, orange line) starting from 1<sup>st</sup> January 2015 (top graph) or 30<sup>th</sup> December 2019 (bottom graph).

190 **Suppl. Figure 9**

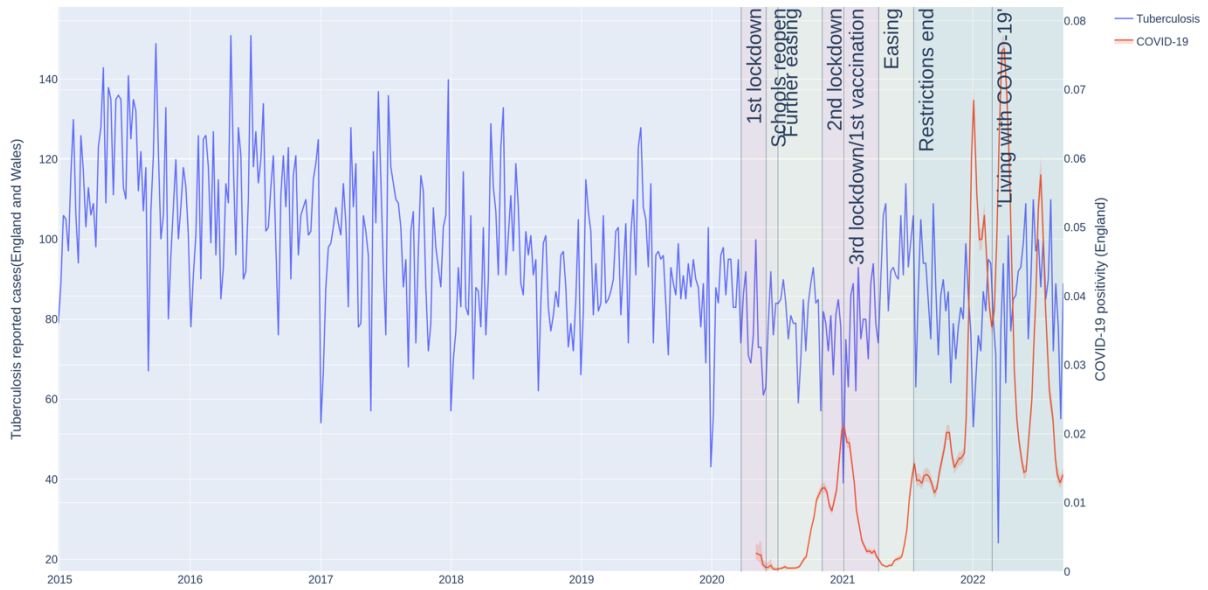

191

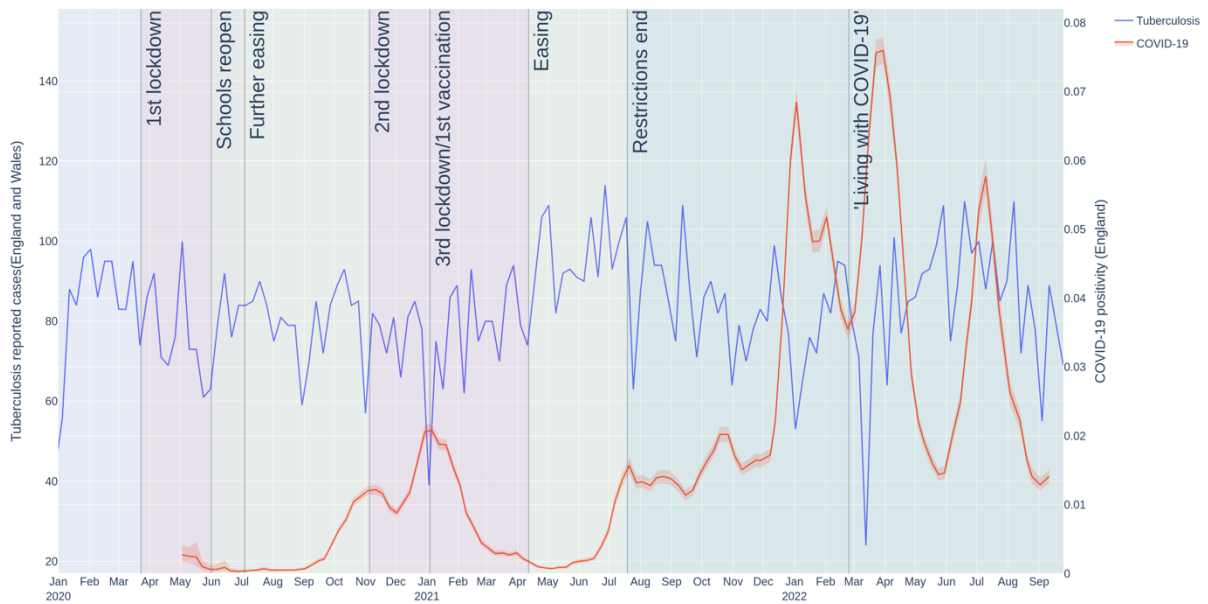

192

193

194

195

196

197

198

**Suppl. Figure 9. Tuberculosis case numbers during the COVID-19 pandemic in England.** Weekly case numbers (tuberculosis: left y-axis, blue line, COVID-19: right y-axis, orange line) starting from 1<sup>st</sup> January 2015 (top graph) or 30<sup>th</sup> December 2019 (bottom graph).

199 **Suppl. Figure 10**

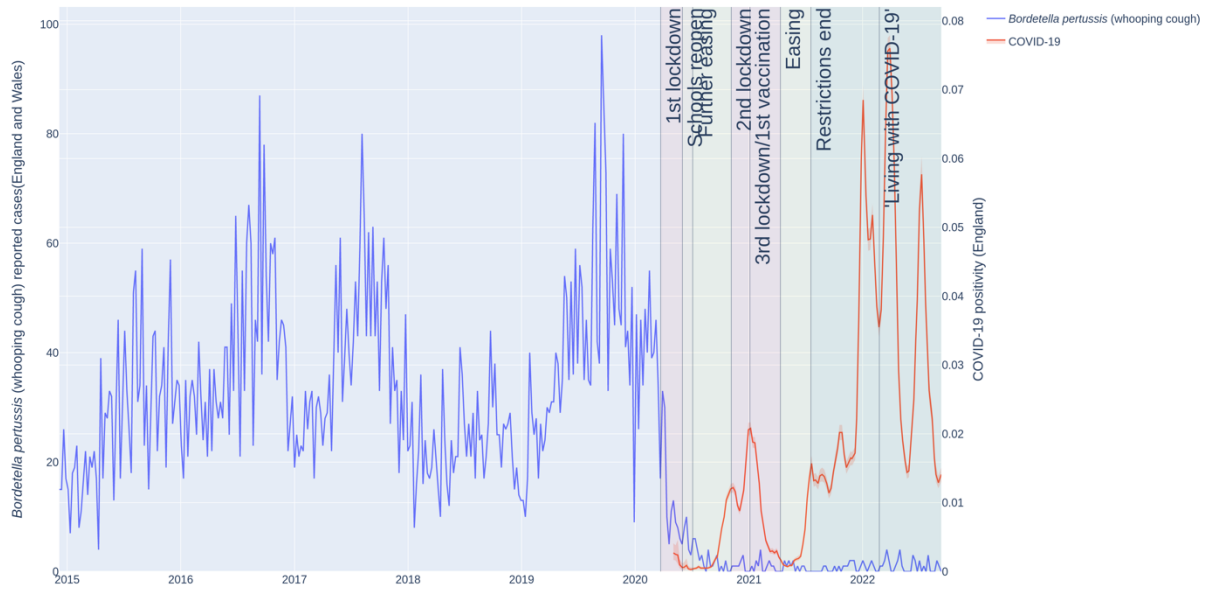

200

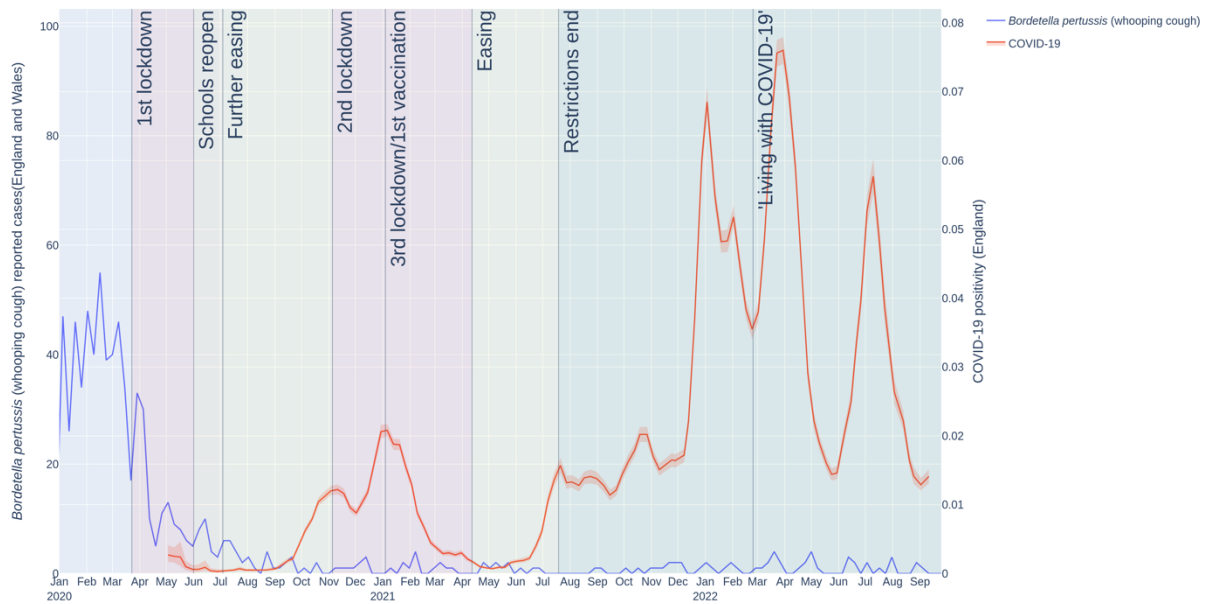

201

202

203

204

205

206

207

**Suppl. Figure 10. Pertussis (*Bordetella pertussis*, whooping cough) case numbers during the COVID-19 pandemic in England. Weekly case numbers (pertussis: left y-axis, blue line, COVID-19: right y-axis, orange line) starting from 1<sup>st</sup> January 2015 (top graph) or 30<sup>th</sup> December 2019 (bottom graph).**

208 **Suppl. Figure 11**

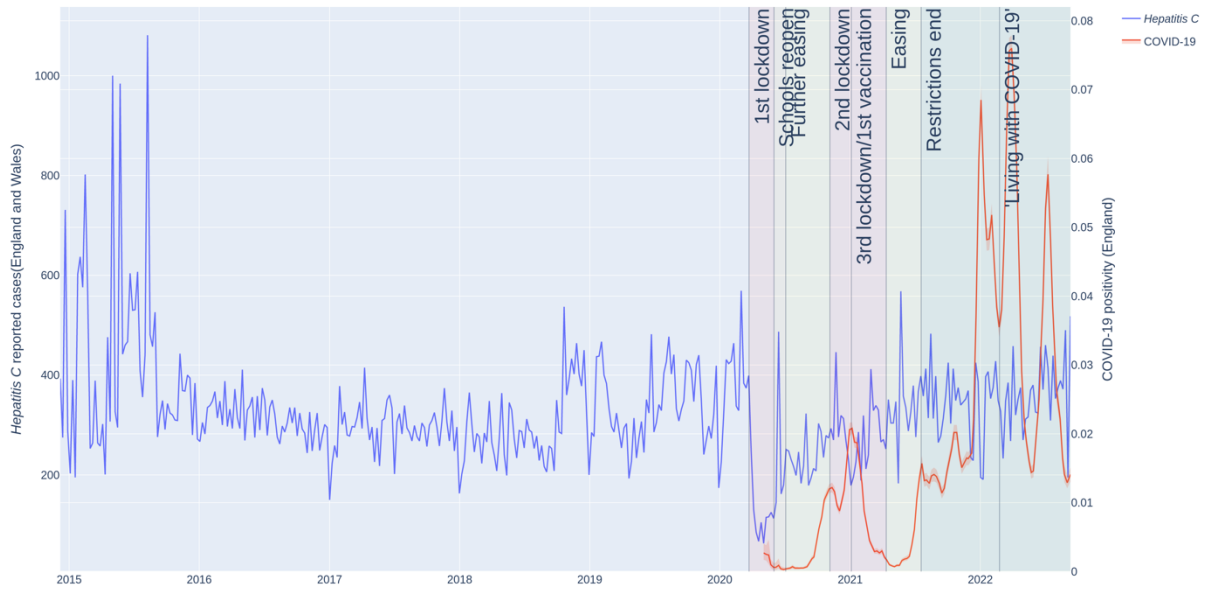

209

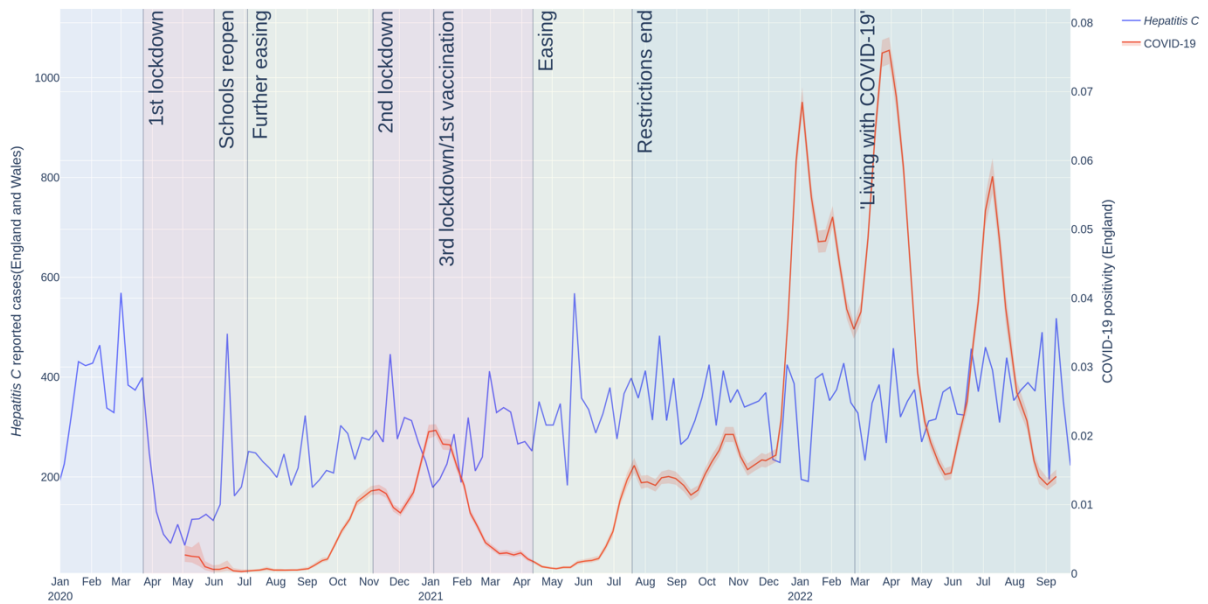

210

211 **Suppl. Figure 11. Hepatitis C case numbers during the COVID-19 pandemic in**  
 212 **England.** Weekly case numbers (hepatitis C: left y-axis, blue line, COVID-19: right y-  
 213 axis, orange line) starting from 1<sup>st</sup> January 2015 (top graph) or 30<sup>th</sup> December 2019  
 214 (bottom graph).

215

216

217 **Suppl. Figure 12**

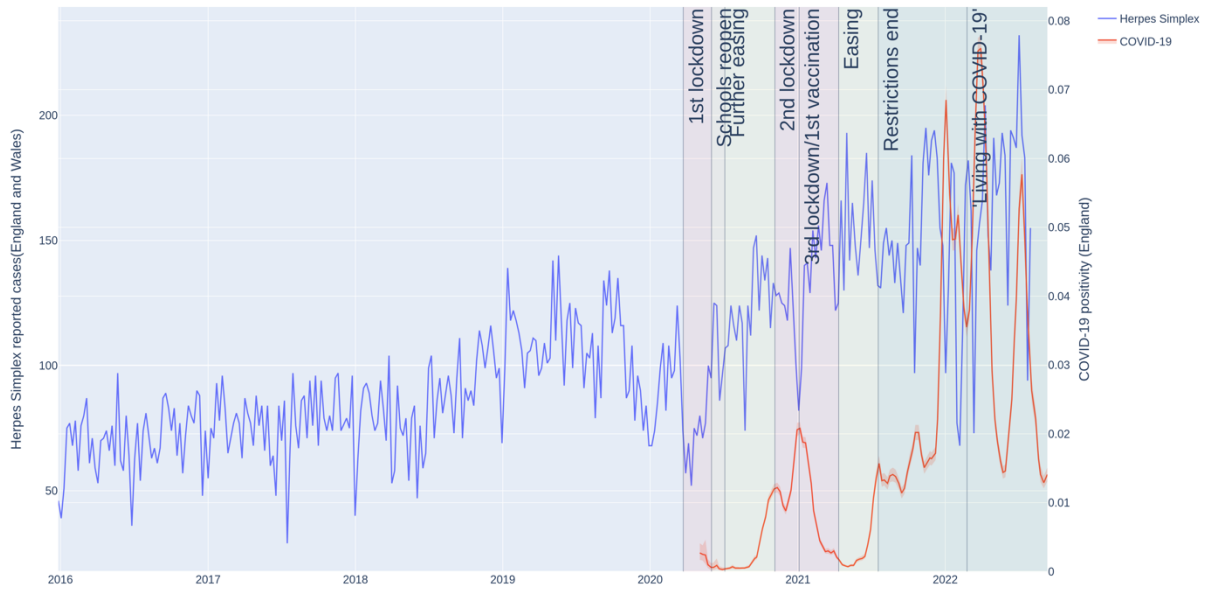

218

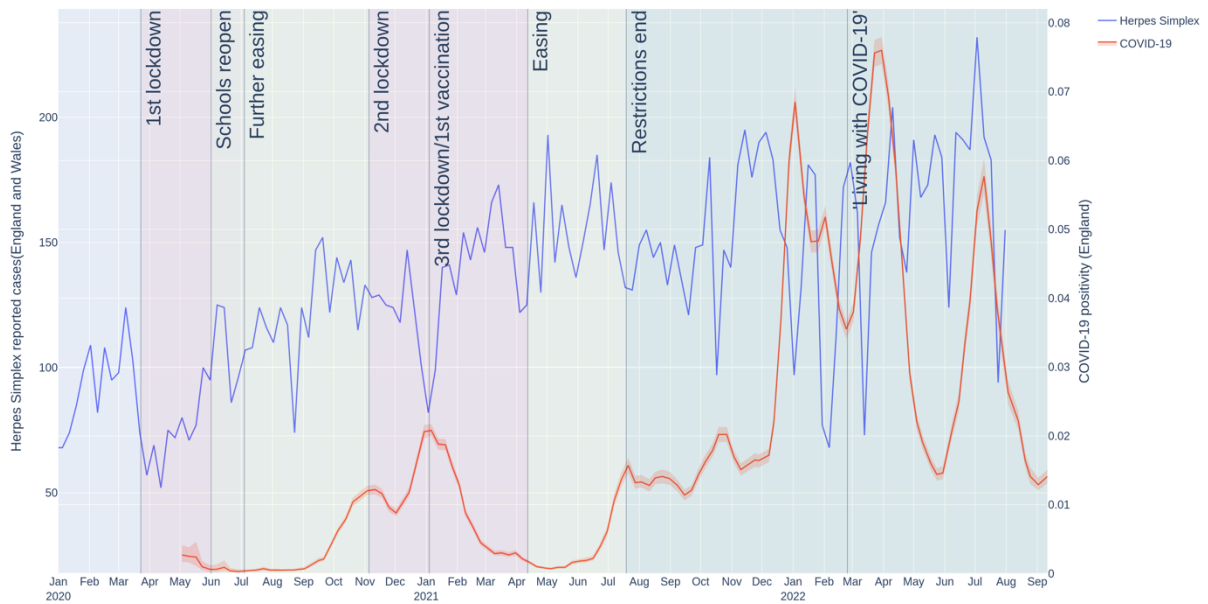

219

220

221

222

223

224

225

**Suppl. Figure 12. Herpes simplex virus case numbers during the COVID-19 pandemic in England.** Weekly case numbers (herpes simplex virus: left y-axis, blue line, COVID-19: right y-axis, orange line) starting from 1<sup>st</sup> January 2016 (top graph) or 30<sup>th</sup> December 2019 (bottom graph).



226 **Suppl. Figure 13**

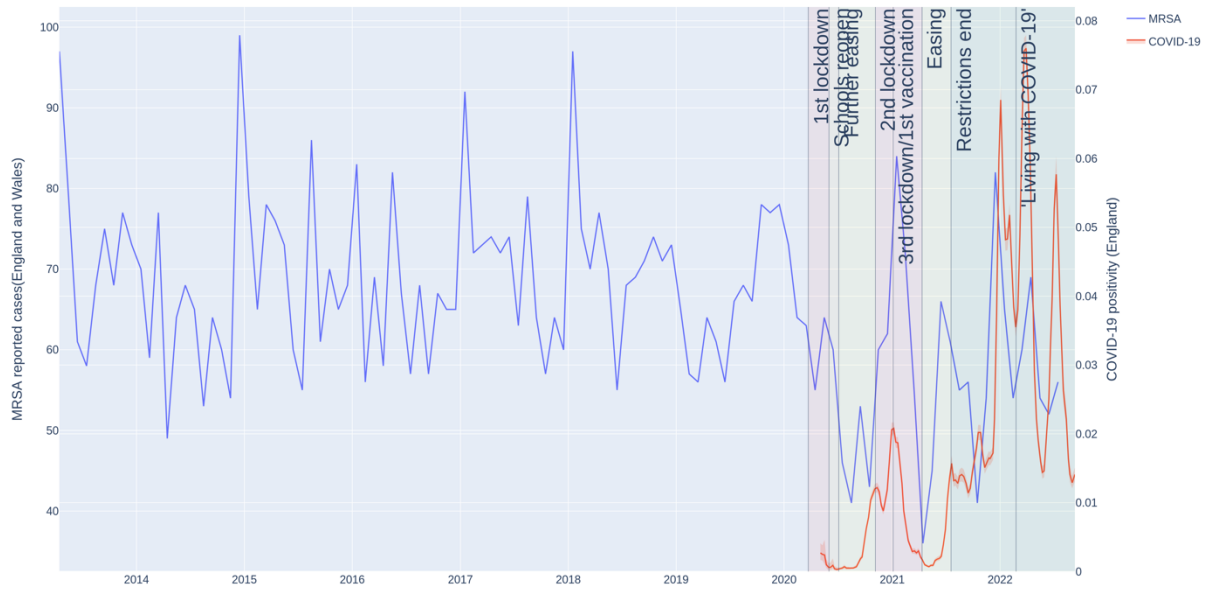

227

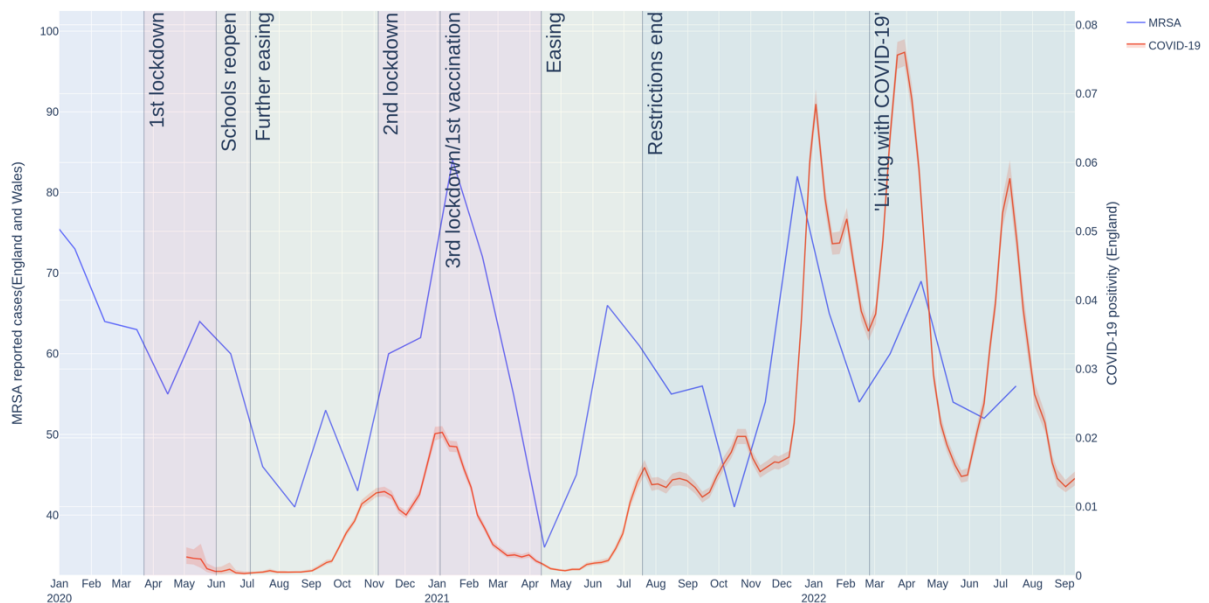

228

229

230

231

232

233

234

**Suppl. Figure 13. Methicillin-resistant *Staphylococcus aureus* (MRSA) case numbers during the COVID-19 pandemic in England.** Weekly case numbers (MRSA: left y-axis, blue line, COVID-19: right y-axis, orange line) starting from 1<sup>st</sup> January 2017 (top graph) or 30<sup>th</sup> December 2019 (bottom graph).

235 **Suppl. Figure 14**

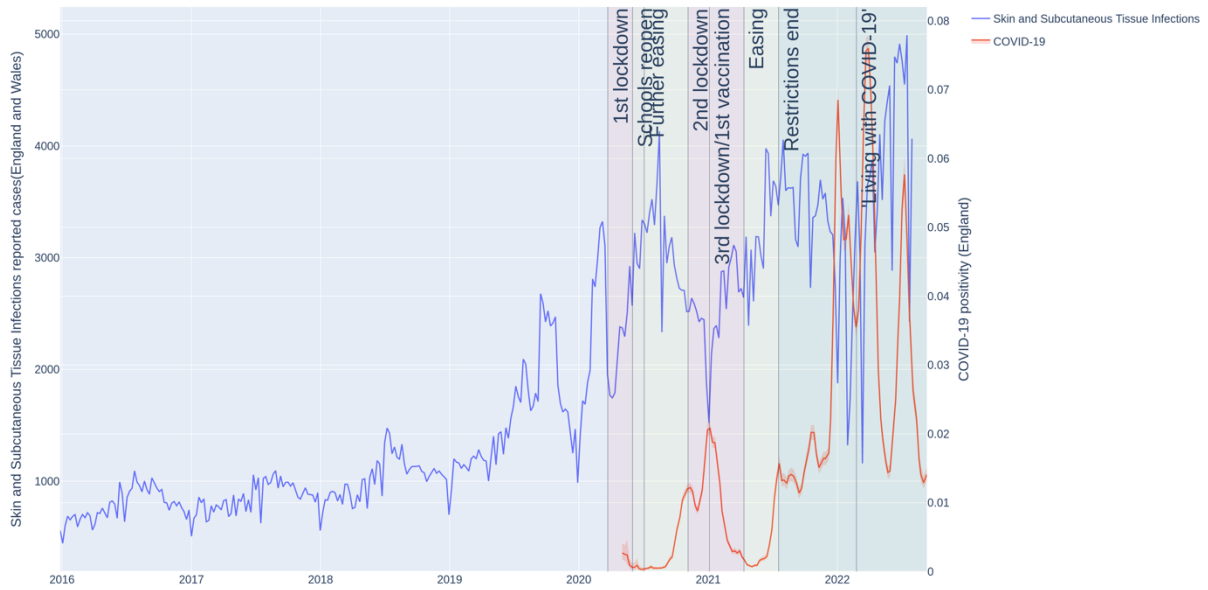

236

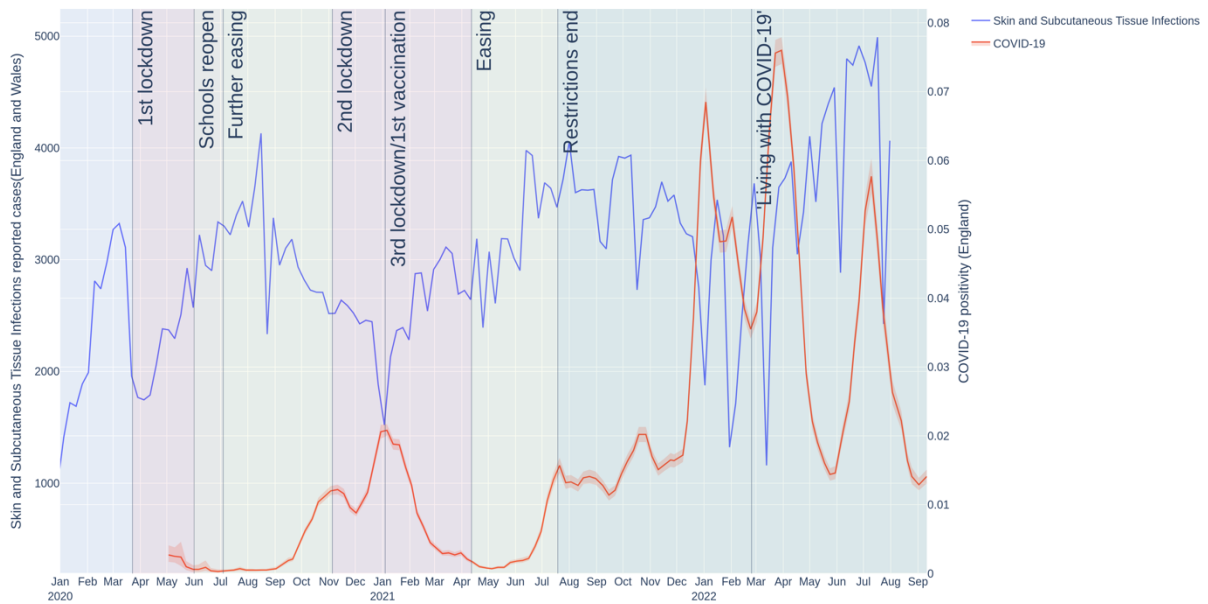

237

238

239

240

241

242

243

**Suppl. Figure 14. Skin and Subcutaneous Tissue Infections case numbers during the COVID-19 pandemic in England. Weekly case numbers (Skin and Subcutaneous Tissue Infections: left y-axis, blue line, COVID-19: right y-axis, orange line) starting from 1<sup>st</sup> January 2016 (top graph) or 30<sup>th</sup> December 2019 (bottom graph).**

244 **Suppl. Figure 15**

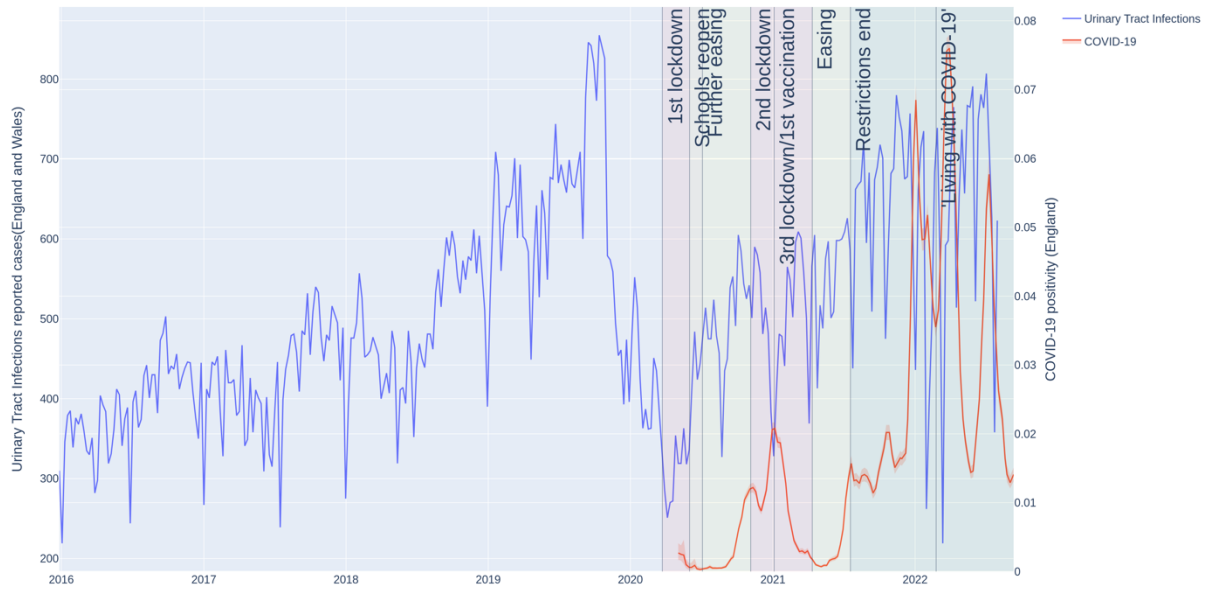

245

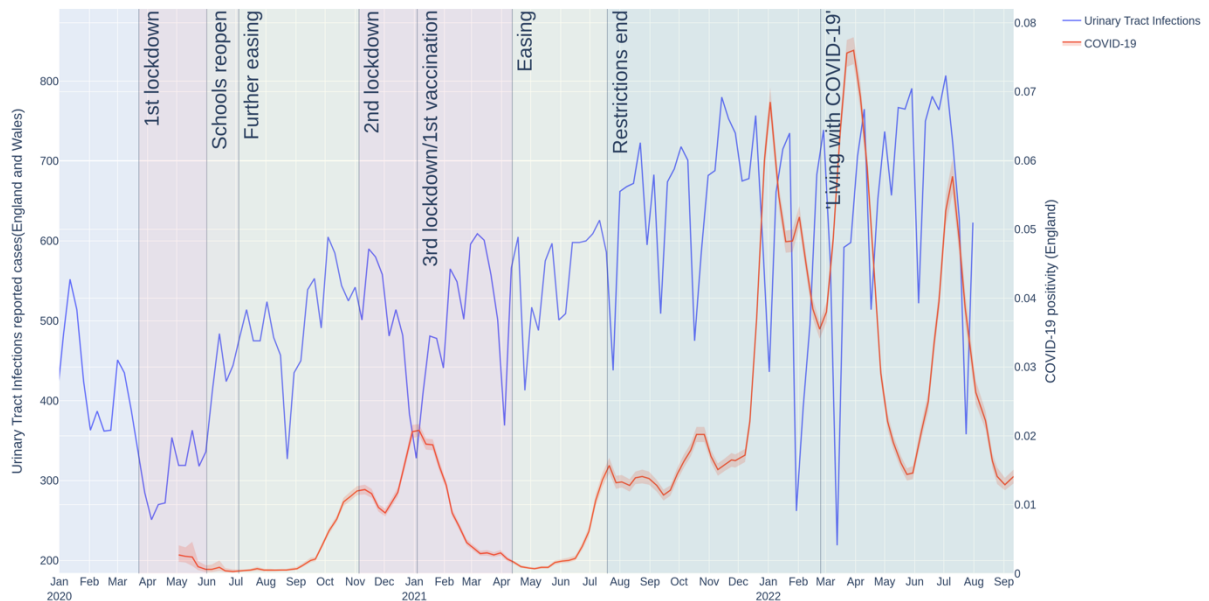

246

247

248

249

250

251

252

**Suppl. Figure 15. Urinary tract infection case numbers during the COVID-19 pandemic in England.** Weekly case numbers (Urinary tract infections: left y-axis, blue line, COVID-19: right y-axis, orange line) starting from 1<sup>st</sup> January 2016 (top graph) or 30<sup>th</sup> December 2019 (bottom graph).

253 **Suppl. Figure 16**

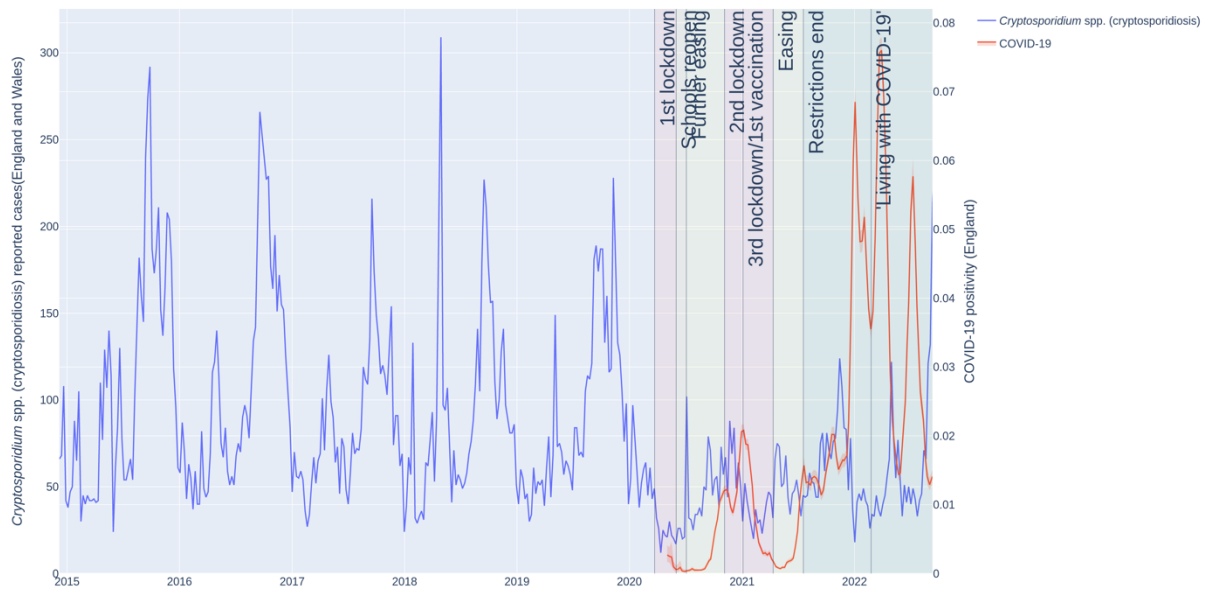

254

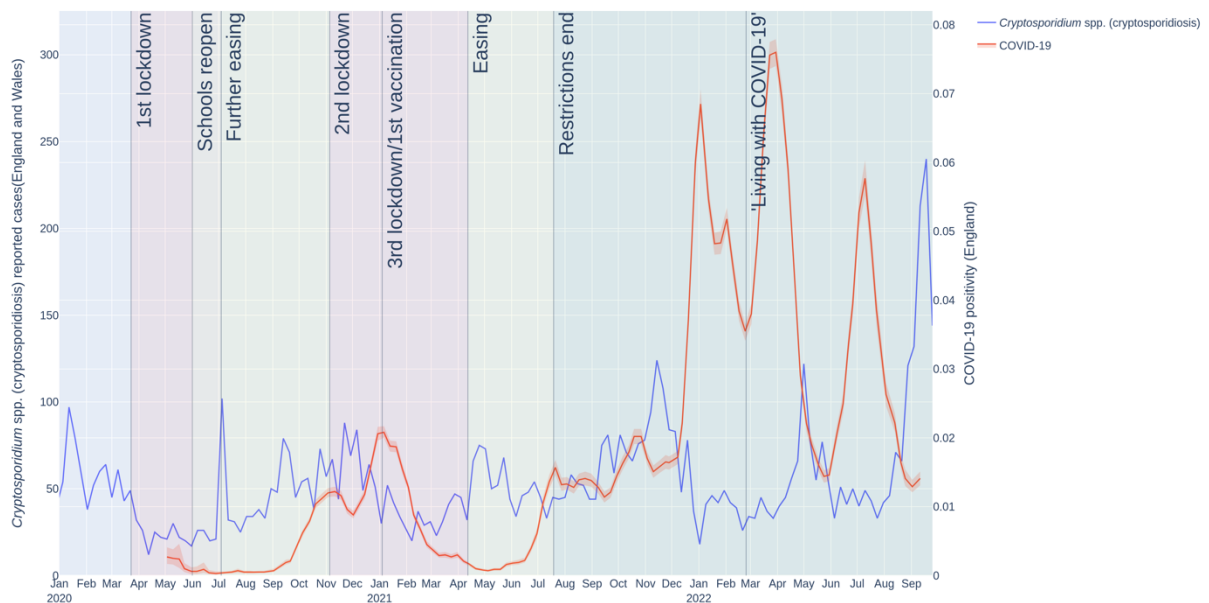

255

256

257

258

259

260

261

**Suppl. Figure 16. Cryptosporidiosis (*Cryptosporidium* spp.) case numbers during the COVID-19 pandemic in England.** Weekly case numbers (*Cryptosporidium* spp.: left y-axis, blue line, COVID-19: right y-axis, orange line) starting from 1<sup>st</sup> January 2015 (top graph) or 30<sup>th</sup> December 2019 (bottom graph).

262 **Suppl. Figure 17**

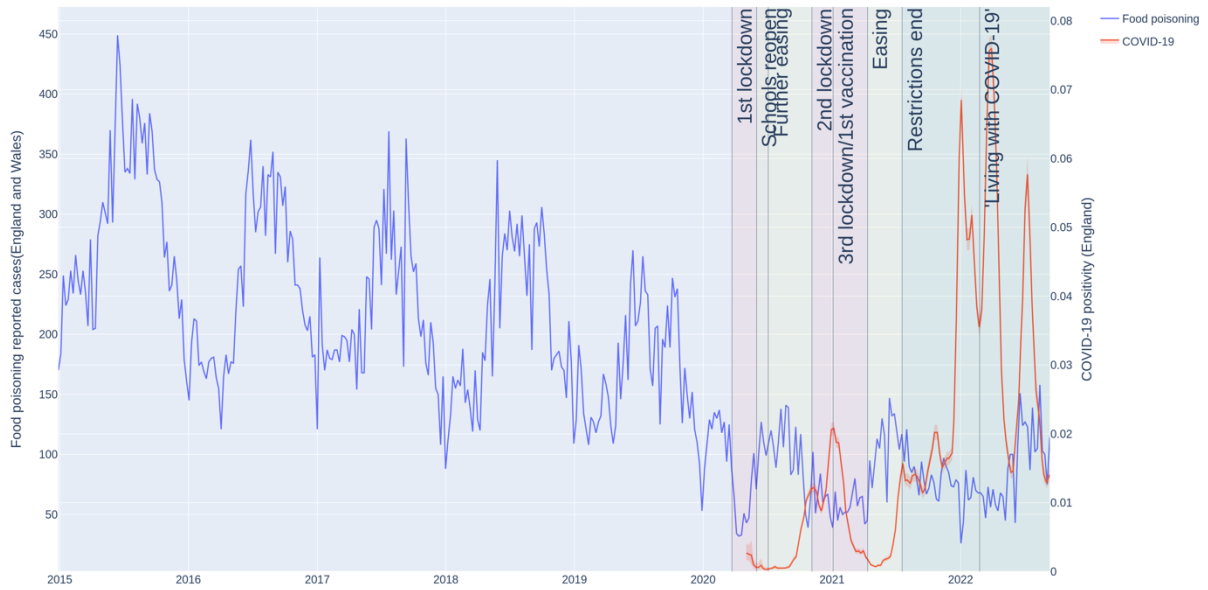

263

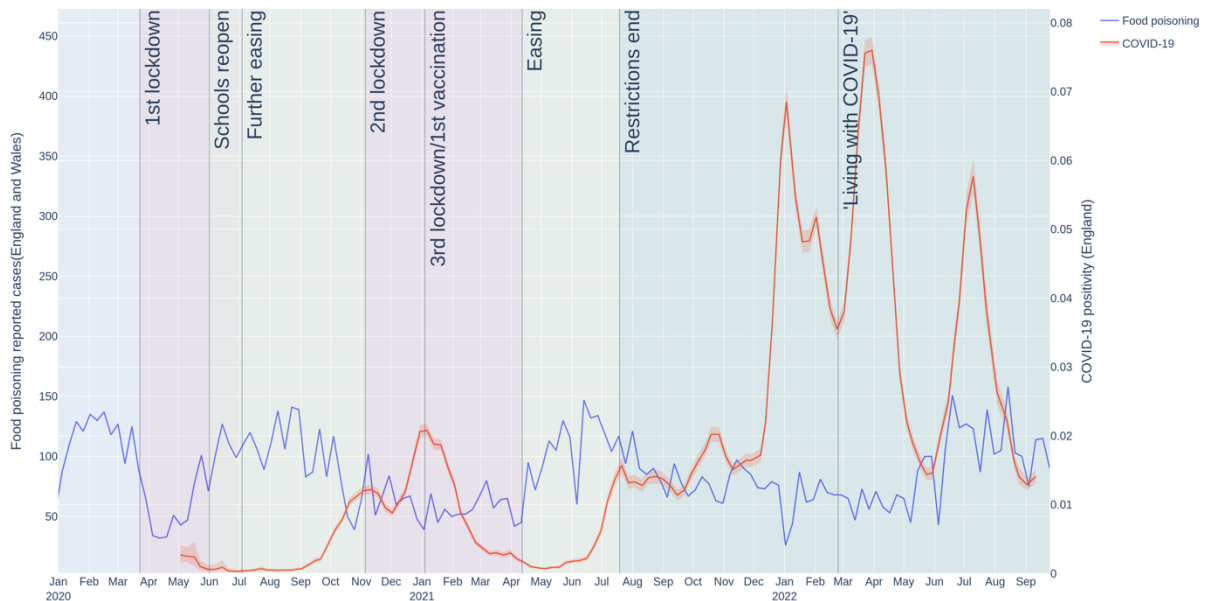

264

265

266

267

268

269

270

**Suppl. Figure 17. Foodborne illness (Food poisoning) case numbers during the COVID-19 pandemic in England.** Weekly case numbers (Food poisoning: left y-axis, blue line, COVID-19: right y-axis, orange line) starting from 1<sup>st</sup> January 2015 (top graph) or 30<sup>th</sup> December 2019 (bottom graph).

271 **Suppl. Figure 18**

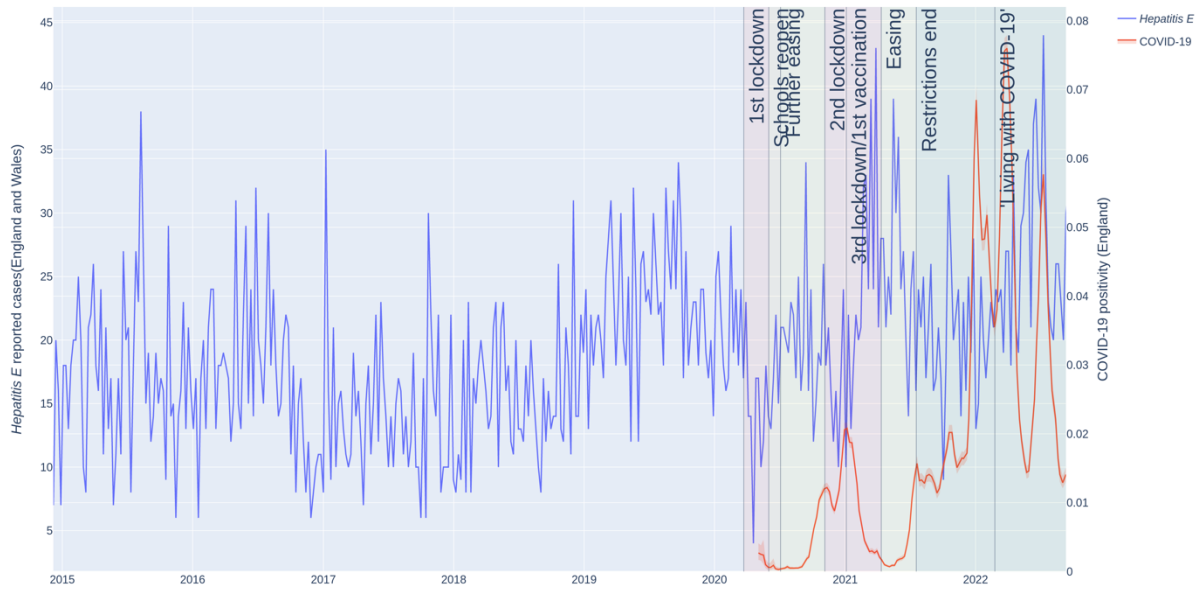

272

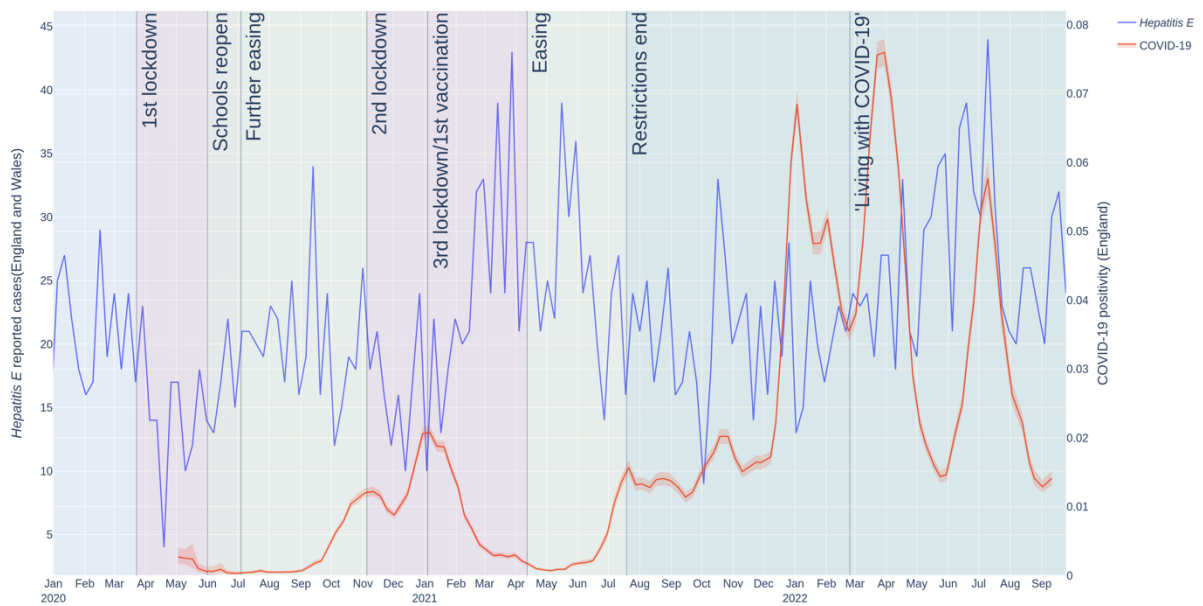

273

274

275

276

277

278

279

**Suppl. Figure 18. Hepatitis E case numbers during the COVID-19 pandemic in England.** Weekly case numbers (hepatitis E: left y-axis, blue line, COVID-19: right y-axis, orange line) starting from 1<sup>st</sup> January 2015 (top graph) or 30<sup>th</sup> December 2019 (bottom graph).

280 **Suppl. Figure 19**

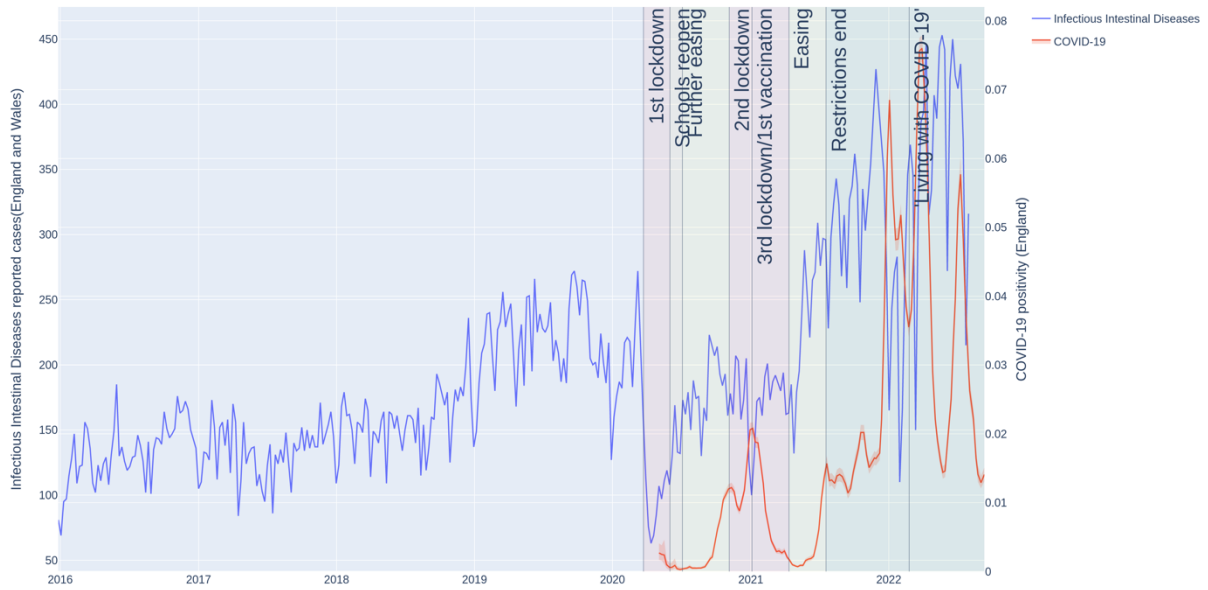

281

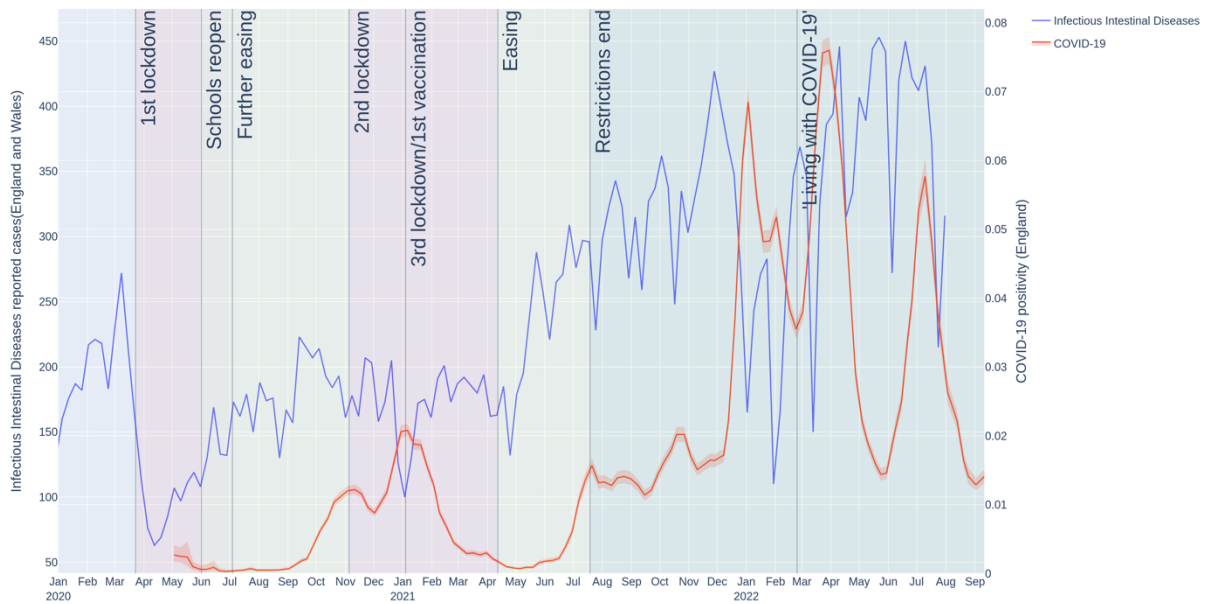

282

283

284

285

286

287

288

**Suppl. Figure 19. Infectious intestinal disease case numbers during the COVID-19 pandemic in England.** Weekly case numbers (Infectious intestinal disease: left y-axis, blue line, COVID-19: right y-axis, orange line) starting from 1<sup>st</sup> January 2016 (top graph) or 30<sup>th</sup> December 2019 (bottom graph).

289 **Suppl. Figure 20**

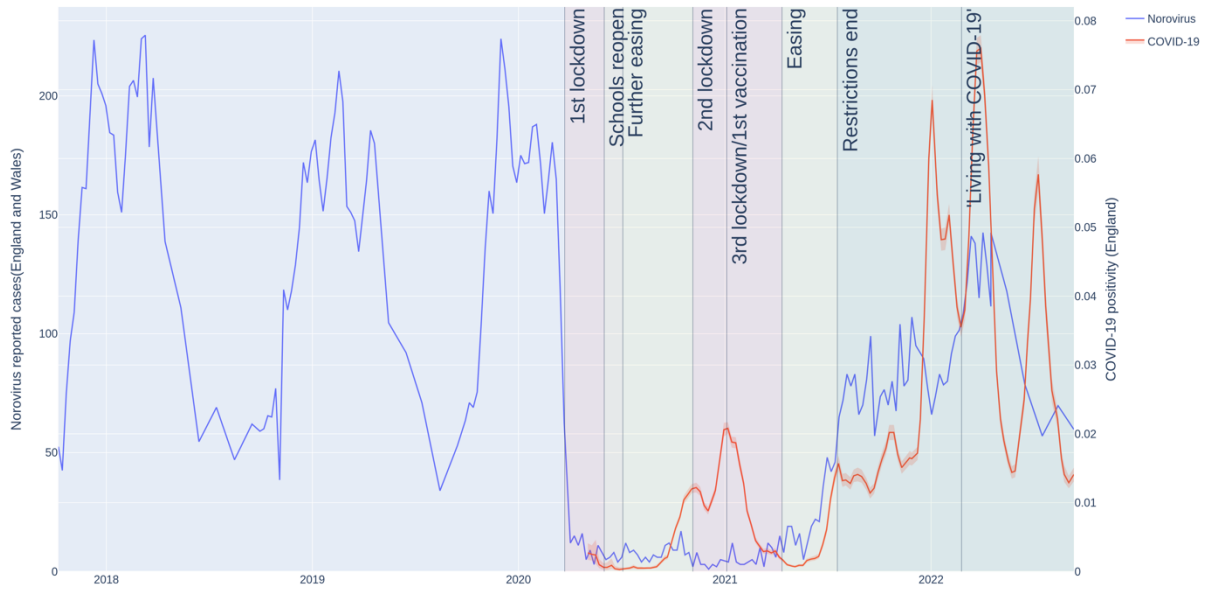

290

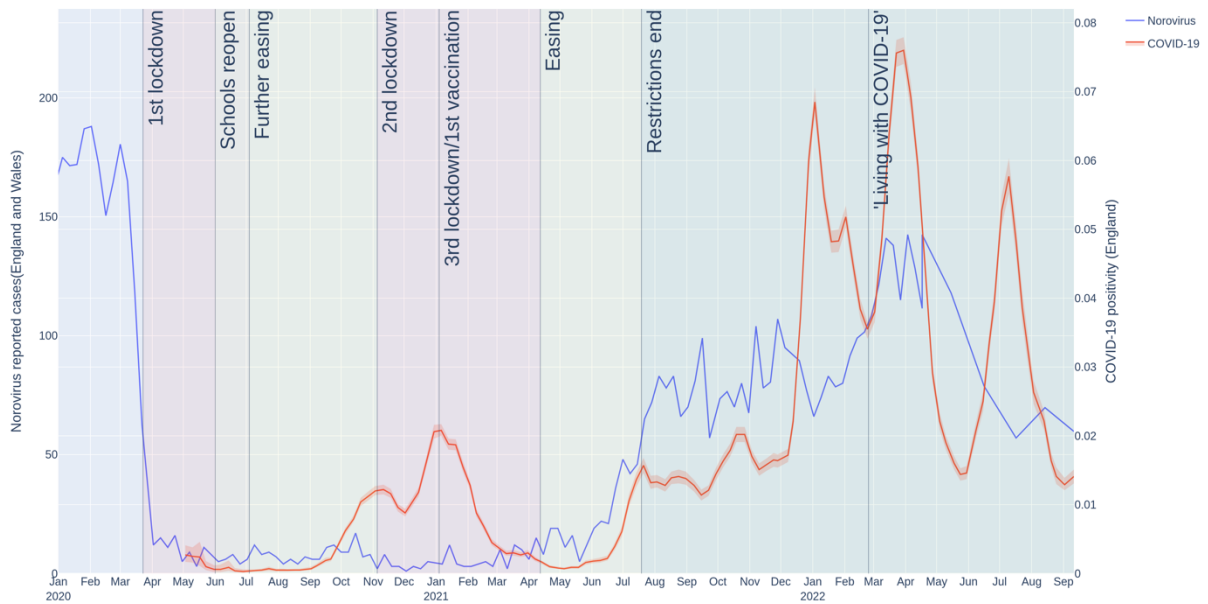

291

292

293

294

295

296

297

**Suppl. Figure 20. Norovirus case numbers during the COVID-19 pandemic in England.** Weekly case numbers (norovirus: left y-axis, blue line, COVID-19: right y-axis, orange line) starting from 2018 (top graph) or 30<sup>th</sup> December 2019 (bottom graph).



298 **Suppl. Figure 21**

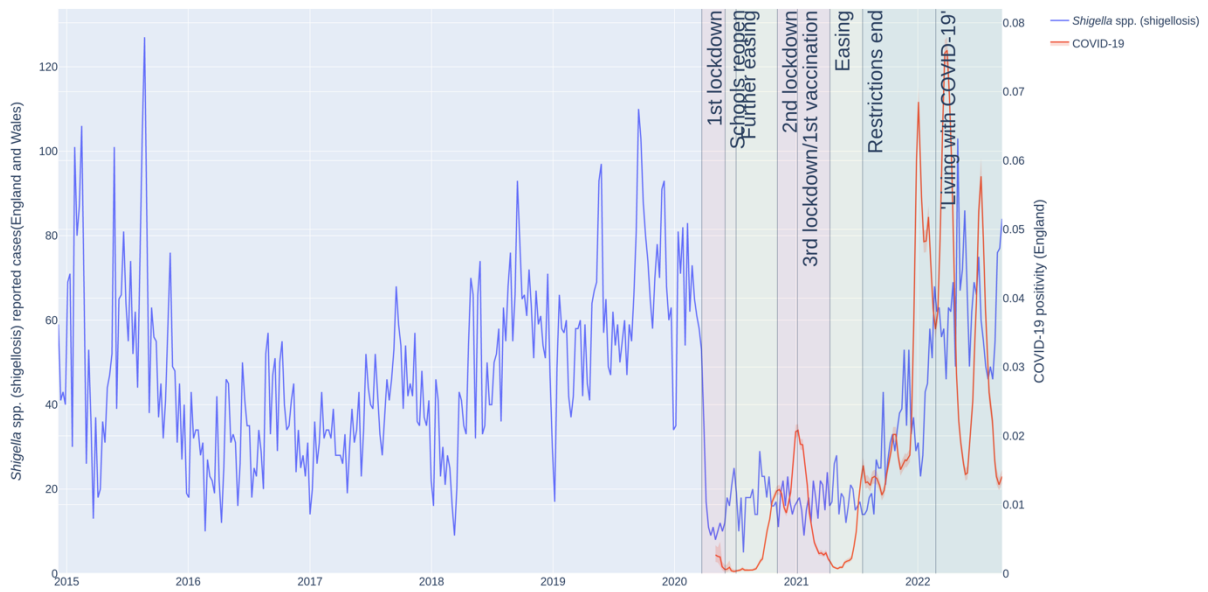

299

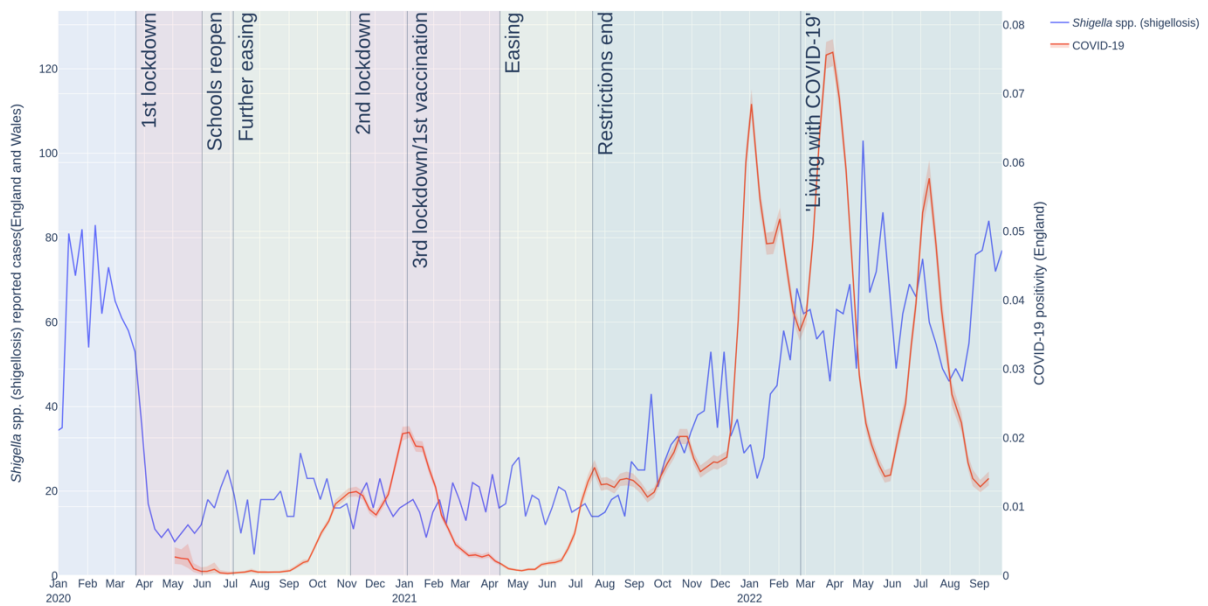

300  
301  
302  
303  
304  
305  
306

**Suppl. Figure 21. Shigellosis (*Shigella spp.*) case numbers during the COVID-19 pandemic in England.** Weekly case numbers (*Shigella spp.*: left y-axis, blue line, COVID-19: right y-axis, orange line) starting from 1<sup>st</sup> January 2015 (top graph) or 30<sup>th</sup> December 2019 (bottom graph).

307 **Suppl. Figure 22**

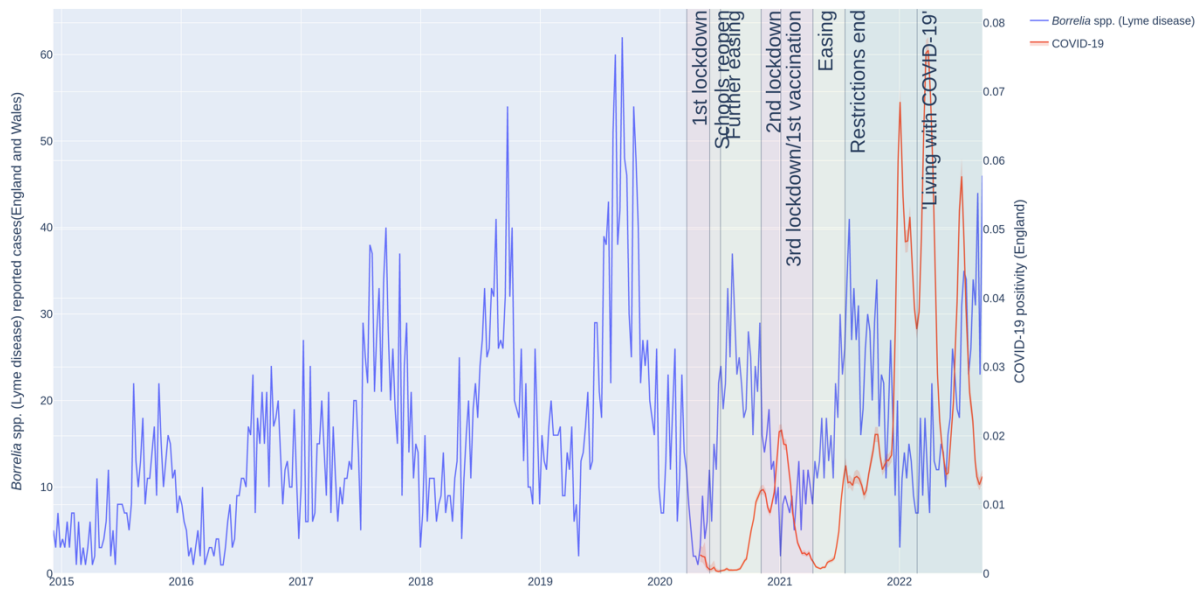

308

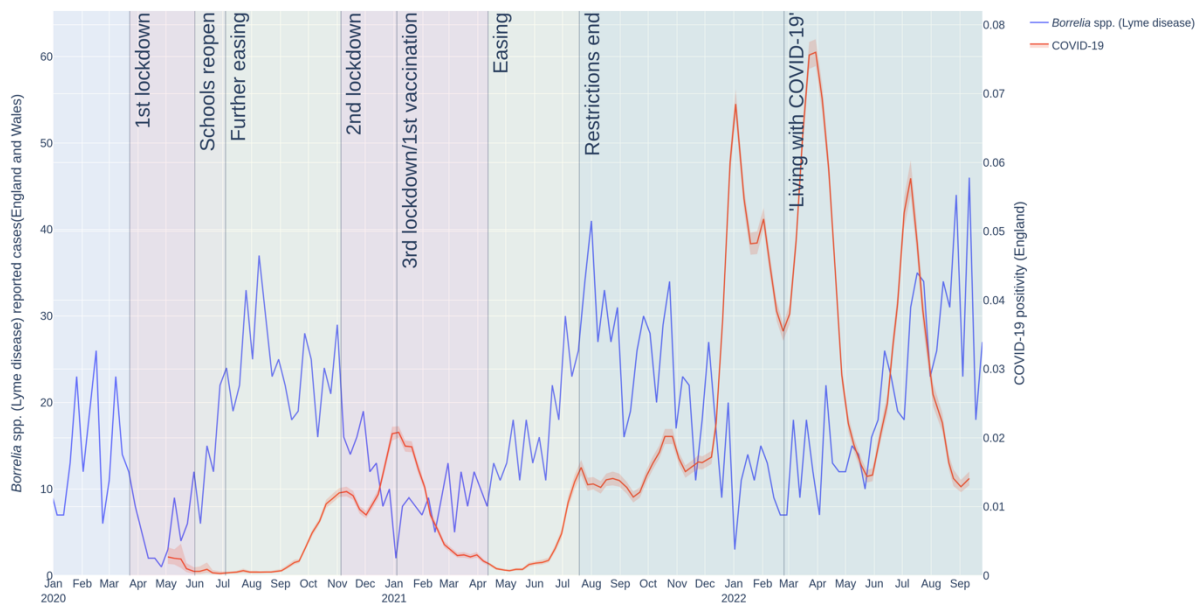

309

310

311

312

313

314

**Suppl. Figure 22. Lyme disease (*Borrelia spp.*) case numbers during the COVID-19 pandemic in England. Weekly case numbers (*Borrelia spp.*: left y-axis, blue line, COVID-19: right y-axis, orange line) starting from 1<sup>st</sup> January 2015 (top graph) or 30<sup>th</sup> December 2019 (bottom graph).**

315 **Suppl. Table 1.** Infectious diseases covered in this study and their anticipated modes  
316 of transmission.

| <b>Mode of transmission</b> | <b>Infectious diseases</b>                                                                                                                   |
|-----------------------------|----------------------------------------------------------------------------------------------------------------------------------------------|
| Airborne/droplet            | Chickenpox, influenza-like-illness, measles, mumps, rubella, pneumococcal disease, scarlet fever, strep throat, tuberculosis, whooping cough |
| Blood-borne                 | Hepatitis C                                                                                                                                  |
| Direct contact              | Herpes simplex virus, methicillin resistant Staphylococcus aureus, skin and subcutaneous tissue infections, urinary tract infections         |
| Faecal-oral                 | Cryptosporidiosis, foodborne illness, hepatitis E, infectious intestinal diseases, norovirus, shigellosis                                    |
| Vector                      | Lyme disease                                                                                                                                 |

317  
318  
319

**Suppl. Table 2.** Timing of COVID-19 protection measures in England.

| <b>Year</b> | <b>Date</b>                          | <b>Week/Quarter</b> | <b>Prevention Measure</b>        | <b>Guidelines</b>                                                                                                                                                                                                                                                                                                                                                                                                                                                                                              |
|-------------|--------------------------------------|---------------------|----------------------------------|----------------------------------------------------------------------------------------------------------------------------------------------------------------------------------------------------------------------------------------------------------------------------------------------------------------------------------------------------------------------------------------------------------------------------------------------------------------------------------------------------------------|
| 2020        | 23 <sup>rd</sup> March               | 13/1                | First lockdown                   | <ul style="list-style-type: none"> <li>- Confinement to household with exception for reasons deemed essential such as food or medicine.</li> <li>- 2-meter social distancing.</li> <li>- Mandatory wearing of face covering.</li> <li>- Closure of schools and non-essential businesses.</li> <li>- Ban of public gatherings.</li> <li>- Cease of foreign travel.</li> <li>- Rigorous hygiene measures including regular hand washing, use of hand sanitiser and frequent disinfection of surfaces.</li> </ul> |
|             | 1 <sup>st</sup> June                 | 23/2                | Schools reopen                   | Phased reopening of nurseries, primary and secondary schools.                                                                                                                                                                                                                                                                                                                                                                                                                                                  |
|             | 4 <sup>th</sup> July                 | 27/3                | Further easing                   | Reopening of all non-essential business, such as restaurants, hairdressers, leisure facilities and tourist attractions.                                                                                                                                                                                                                                                                                                                                                                                        |
|             | 5 <sup>th</sup> November             | 45/4                | Second lockdown                  | Schools and universities remained open.                                                                                                                                                                                                                                                                                                                                                                                                                                                                        |
| 2021        | 4 <sup>th</sup> /5 <sup>th</sup> Jan | 1/1                 | First vaccination/Third lockdown | Phased administration of the COVID-19 vaccine.                                                                                                                                                                                                                                                                                                                                                                                                                                                                 |
|             | 12 <sup>th</sup> April               | 15/2                | Easing                           | Reopening of all non-essential business.                                                                                                                                                                                                                                                                                                                                                                                                                                                                       |
|             | 19 <sup>th</sup> July                | 29/3                | Restrictions end                 | All restrictions lifted including removal of social distancing and reopening of existing closed sectors such as nightclubs.                                                                                                                                                                                                                                                                                                                                                                                    |
| 2022        | 24 <sup>th</sup> February            | 8/1                 | 'Living with COVID-19' strategy  | Legal requirement to self-isolate and wear face coverings removed.                                                                                                                                                                                                                                                                                                                                                                                                                                             |
